# Supplementary material for: Transcriptional Homeostasis of Oxidative Stress-Related Pathways in Altered Gravity
Source: PubMed Central journal article supplement (PMC6164947; doi:10.3390/ijms19092814), 2018-09-18
Supplement: ijms-19-02814-s001.pdf [file ijms-19-02814-s001.pdf]

**Supplementary Figure 1.** Experiment design of the parabolic flight (19th and 23rd DLR PFC) and suborbital ballistic rocket (TEXUS-49 and TEXUS-51) experiments. **(a)** During the parabolic flight campaigns, U937 or Jurkat T cells were analyzed before and during the first parabola. 1g in-flight control (1g IF) samples were lysed 5 min before the first parabola, 1.8g hypergravity samples at the end of the first 1.8g phase, and microgravity samples at the end of the first microgravity phase. After the flight, 1g ground controls were performed in the experiment hardware inside the aircraft. **(b)** During the suborbital ballistic rocket missions, U937 and Jurkat T cells were lysed at time point T+75s to monitor the hypergravity and vibration effects of the rocket launch. Microgravity samples and 1g in-flight reference centrifuge control samples (for the TEXUS-51 mission) were lysed after 375s post-launch. Additionally, hardware 1g ground controls as well as cell culture controls (for the TEXUS-51 mission) were lysed post-flight approximately 15min after the rocket launch. **(c)** In-flight experiment system for parabolic flights on board the Airbus A300 / A310 ZERO-G. **(c1)** Experiment hardware structure which consists of an incubator rack to store the cell containers at 37°C before the experiment (1), an experiment rack, in which all technical aggregates are accommodated for the execution of the experiment and where the living cells are processed during altered gravity (2), and a cooling rack to store all cell containers at 4°C after the injection of the lysis solution until landing (3). **(c2)** Double-walled, liquid-proof cell container. A maximum of 54 container can be accommodated during one flight. 1 = plastic container, 2 = air valve, 3 = internal sterile cell culture bag (Nutrimix, 0.25 l), 4 = connector 1 (medium), 5 = connector 2 (lysis buffer), 6 = connector 3 (port for filling of cells, performed pre-flight), 7 = plastic flange. **(d)** In-flight experiment system for the suborbital ballistic rocket flight of the TEXUS-49 and TEXUS-51 payload. TEXUS consists of a VSB-30 engine (not shown) and of the payload structure. Sets of three sterile syringes were filled with cell suspension, medium, and lysis buffer connected by a T-piece with small plugs at the outlet ports to prevent premature contact of the fluids (**d4**). The syringe systems are accommodated in tempered and vacuum-resistant containers (**d3**, **d5**) at the static (**d2**) or centrifuge (**d1**) (TEXUS-51) position. The figure has been re-used and modified from our previous work [35,36] under the CC BY license (Creative Commons Attribution 4.0 International License).

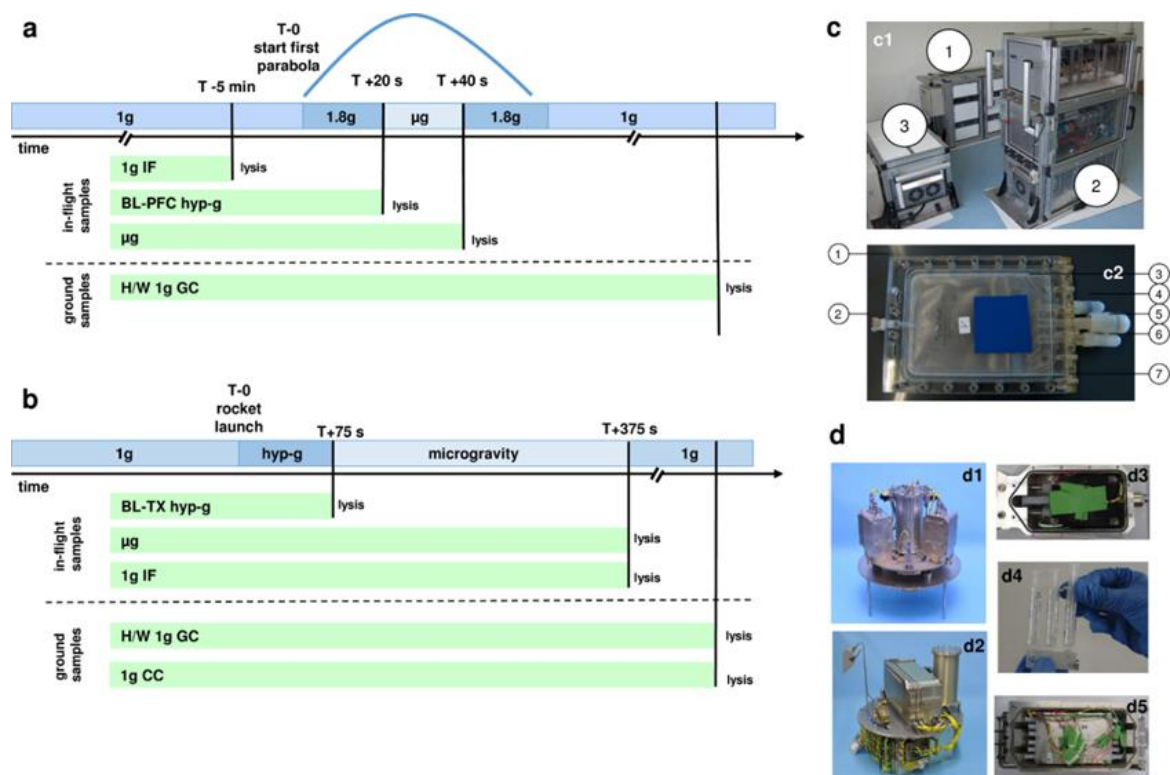

**Supplementary Table 1.** Selection of microarray probes for the oxidative stress response analysis. Based on the gene collection of the RT<sup>2</sup> Profiler™ PCR Array Human Oxidative Stress (Qiagen) and further literature [67] 86 genes relevant for oxidative stress response were identified and collected. For each gene, the gene symbol, as well as the UniGene, GenBank and Entrez ID identifier are listed. Regarding the Affymetrix array, the number of transcript clusters and the associated transcript cluster IDs are mentioned for each gene. For the NimbleGen array, the probeset IDs as well as the number of transcripts are given.

| Symbol | UniGene   | GenBank   | Entrez ID | Affymetrix GeneChip® Human Transcriptome Array |                        | NimbleGen Array       |                                         |
|--------|-----------|-----------|-----------|------------------------------------------------|------------------------|-----------------------|-----------------------------------------|
|        |           |           |           | Number of transcript clusters                  | Transcript Cluster IDs | Number of transcripts | Probeset IDs                            |
| ALB    | Hs.418167 | NM_000477 | 213       | 1                                              | TC04000403.hg.1        | 4                     | BC034023; BC035969; BC041789; NM_000477 |
| ALOX12 | Hs.654431 | NM_000697 | 239       | 1                                              | TC17000081.hg.1        | 2                     | BC069557; NM_000697                     |
| AOX1   | Hs.406238 | NM_001159 | 316       | 1                                              | TC02001162.hg.1        | 1                     | NM_001159                               |
| APOE   | Hs.654439 | NM_000041 | 348       | 1                                              | TC19000633.hg.1        | 1                     | NM_000041                               |
| ATOX1  | Hs.125213 | NM_004045 | 475       | 1                                              | TC05001957.hg.1        | 2                     | BC112248; NM_004045                     |
| BNIP3  | Hs.144873 | NM_004052 | 664       | 1                                              | TC10001769.hg.1        | 2                     | BC021989; NM_004052                     |
| CAT    | Hs.502302 | NM_001752 | 847       | 1                                              | TC11000327.hg.1        | 2                     | BC112217; NM_001752                     |
| CCL5   | Hs.514821 | NM_002985 | 6352      | 1                                              | TC17001378.hg.1        | 2                     | BC008600; NM_002985                     |
| CCS    | Hs.502917 | NM_005125 | 9973      | 1                                              | TC11000672.hg.1        | 2                     | BC105016; NM_005125                     |
| CYBA   | Hs.513803 | NM_000101 | 1535      | 1                                              | TC16001339.hg.1        | 2                     | BC006465; NM_000101                     |
| CYBB   | Hs.292356 | NM_000397 | 1536      | 1                                              | TC0X000171.hg.1        | 2                     | BC032720; NM_000397                     |
| CYGB   | Hs.95120  | NM_134268 | 114757    | 1                                              | TC17001902.hg.1        | 1                     | NM_134268                               |
| DHCR24 | Hs.498727 | NM_014762 | 1718      | 1                                              | TC01002694.hg.1        | 2                     | BC004375; NM_014762                     |
| DUOX1  | Hs.272813 | NM_175940 | 53905     | 1                                              | TC15000352.hg.1        | 1                     | NM_017434                               |
| DUOX2  | Hs.71377  | NM_014080 | 50506     | 1                                              | TC15001305.hg.1        | 2                     | AF230496; NM_014080                     |
| DUSP1  | Hs.171695 | NM_004417 | 1843      | 1                                              | TC05002066.hg.1        | 1                     | NM_004417                               |

|       |           |           |        |   |                                             |   |                                |
|-------|-----------|-----------|--------|---|---------------------------------------------|---|--------------------------------|
| EPHX2 | Hs.212088 | NM_001979 | 2053   | 1 | TC08000208.hg.1                             | 1 | NM_001979                      |
| EPX   | Hs.279259 | NM_000502 | 8288   | 1 | TC17000711.hg.1                             | 1 | NM_000502                      |
| FOXMI | Hs.239    | NM_021953 | 2305   | 1 | TC12001106.hg.1                             | 3 | BC006192; NM_021953; NM_202003 |
| FTH1  | Hs.645560 | NM_002032 | 2495   | 1 | TC11001860.hg.1                             | 3 | BC000857; BC066341; NM_002032  |
| GCLC  | Hs.654465 | NM_001498 | 2729   | 1 | TC06004051.hg.1                             | 2 | BC039894; NM_001498            |
| GCLM  | Hs.315562 | NM_002061 | 2730   | 1 | TC01002882.hg.1                             | 2 | BC041809; NM_002061            |
| GPX1  | Hs.76686  | NM_000581 | 2876   | 1 | TC03001407.hg.1                             | 3 | BC000742; NM_000581; NM_201397 |
| GPX2  | Hs.2704   | NM_002083 | 2877   | 1 | TC14001223.hg.1                             | 2 | BC005277; NM_002083            |
| GPX3  | Hs.386793 | NM_002084 | 2878   | 1 | TC05000837.hg.1                             | 2 | BC050378; NM_002084            |
| GPX4  | Hs.433951 | NM_002085 | 2879   | 1 | TC19000030.hg.1                             | 2 | NM_001039847; NM_001039848     |
| GPX5  | Hs.248129 | NM_001509 | 2880   | 2 | TC06000286.hg.1;<br>TC6_cox_hap2000001.hg.1 | 2 | NM_001509; NM_003996           |
| GPX6  | Hs.448570 | NM_182701 | 257202 | 2 | TC06001444.hg.1;<br>TC6_cox_hap2000110.hg.1 | 1 | NM_182701                      |
| GPX7  | Hs.43728  | NM_015696 | 2882   | 1 | TC01000643.hg.1                             | 2 | BC032788; NM_015696            |
| GSR   | Hs.271510 | NM_000637 | 2936   | 1 | TC08001110.hg.1                             | 2 | BC069244; NM_000637            |
| GSS   | Hs.82327  | NM_000178 | 2937   | 1 | TC20000789.hg.1                             | 1 | NM_000178                      |
| GSTP1 | Hs.523836 | NM_000852 | 2950   | 1 | TC11000694.hg.1                             | 2 | BC010915; NM_000852            |
| GSTZ1 | Hs.655292 | NM_001513 | 2954   | 1 | TC14000489.hg.1                             | 3 | BC001453; NM_001513; NM_145870 |
| GTF2I | Hs.520459 | NM_001518 | 2969   | 1 | TC07000458.hg.1                             | 2 | BC004472; NM_001518            |
| HMOX1 | Hs.517581 | NM_002133 | 3162   | 1 | TC22000259.hg.1                             | 2 | BC001491; NM_002133            |

|        |           |           |        |    |                                                                                                                                                                                                                                                                                                                                                                                                         |   |                                              |
|--------|-----------|-----------|--------|----|---------------------------------------------------------------------------------------------------------------------------------------------------------------------------------------------------------------------------------------------------------------------------------------------------------------------------------------------------------------------------------------------------------|---|----------------------------------------------|
| HSPA1A | Hs.728810 | NM_005345 | 3303   | 15 | TC06001547.hg.1;<br>TC6_apd_hap1000088.hg.1;<br>TC6_cox_hap2000174.hg.1;<br>TC6_dbb_hap3000163.hg.1;<br>TC6_qbl_hap6000164.hg.1;<br>TC06000384.hg.1;<br>TC6_apd_hap1000039.hg.1;<br>TC6_cox_hap2000078.hg.1;<br>TC6_dbb_hap3000069.hg.1;<br>TC6_qbl_hap6000069.hg.1;<br>TC06000385.hg.1;<br>TC6_apd_hap1000040.hg.1;<br>TC6_cox_hap2000079.hg.1;<br>TC6_dbb_hap3000070.hg.1;<br>TC6_qbl_hap6000070.hg.1 | 3 | AK096017; BC009322; NM_005345                |
| KRT1   | Hs.80828  | NM_006121 | 3848   | 1  | TC12001532.hg.1                                                                                                                                                                                                                                                                                                                                                                                         | 2 | BC063697; NM_006121                          |
| LPO    | Hs.234742 | NM_006151 | 4025   | 1  | TC17000712.hg.1                                                                                                                                                                                                                                                                                                                                                                                         | 2 | BC107166; NM_006151                          |
| MB     | Hs.517586 | NM_005368 | 4151   | 2  | TC22000697.hg.1;<br>TC22000698.hg.1                                                                                                                                                                                                                                                                                                                                                                     | 4 | BC018001; NM_005368; NM_203377;<br>NM_203378 |
| MBL2   | Hs.499674 | NM_000242 | 4153   | 1  | TC10001301.hg.1                                                                                                                                                                                                                                                                                                                                                                                         | 2 | BC069338; NM_000242                          |
| MGST3  | Hs.191734 | NM_004528 | 4259   | 2  | TC01001444.hg.1;<br>TC01001443.hg.1                                                                                                                                                                                                                                                                                                                                                                     | 2 | CR607567; NM_004528                          |
| MPO    | Hs.458272 | NM_000250 | 4353   | 1  | TC17001727.hg.1                                                                                                                                                                                                                                                                                                                                                                                         | 2 | NM_000250; X04876                            |
| MPV17  | Hs.75659  | NM_002437 | 4358   | 1  | TC02001681.hg.1                                                                                                                                                                                                                                                                                                                                                                                         | 1 | NM_002437                                    |
| MSRA   | Hs.490981 | NM_012331 | 4482   | 2  | TC08000071.hg.1;<br>TC08000073.hg.1                                                                                                                                                                                                                                                                                                                                                                     | 3 | AY958431; BC054033; NM_012331                |
| MT3    | Hs.73133  | NM_005954 | 4504   | 1  | TC16000465.hg.1                                                                                                                                                                                                                                                                                                                                                                                         | 2 | BC013081; NM_005954                          |
| NCF1   | Hs.647047 | NM_000265 | 653361 | 1  | TC07000459.hg.1                                                                                                                                                                                                                                                                                                                                                                                         | 2 | NM_000265; XM_928908                         |
| NCF2   | Hs.587558 | NM_000433 | 4688   | 1  | TC01003616.hg.1                                                                                                                                                                                                                                                                                                                                                                                         | 2 | BC001606; NM_000433                          |
| NCF4   | Hs.474781 | NM_000631 | 4689   | 1  | TC22000270.hg.1                                                                                                                                                                                                                                                                                                                                                                                         | 1 | NM_000631                                    |
| NOS2   | Hs.709191 | NM_000625 | 4843   | 1  | TC17002894.hg.1                                                                                                                                                                                                                                                                                                                                                                                         | 1 | NM_000625                                    |
| NOX4   | Hs.371036 | NM_016931 | 50507  | 1  | TC11002178.hg.1                                                                                                                                                                                                                                                                                                                                                                                         | 4 | AJ704727; BC040105; BC051371; NM_016931      |
| NOX5   | Hs.657932 | NM_024505 | 79400  | 1  | TC15000630.hg.1                                                                                                                                                                                                                                                                                                                                                                                         | 2 | AK074071; NM_024505                          |
| NQO1   | Hs.406515 | NM_000903 | 1728   | 1  | TC16001225.hg.1                                                                                                                                                                                                                                                                                                                                                                                         | 2 | BC007659; NM_000903                          |

|        |           |           |        |   |                 |   |                                                                |
|--------|-----------|-----------|--------|---|-----------------|---|----------------------------------------------------------------|
| NUDT1  | Hs.534331 | NM_002452 | 4521   | 1 | TC07000029.hg.1 | 6 | BC014618; BC065367; NM_002452; NM_198948; NM_198949; NM_198953 |
| OXR1   | Hs.148778 | NM_181354 | 55074  | 1 | TC08000660.hg.1 | 5 | AB075503; AF309387; AK096148; BC032710; NM_181354              |
| OXSRI  | Hs.475970 | NM_005109 | 9943   | 1 | TC03000188.hg.1 | 2 | BC008726; NM_005109                                            |
| PDLIM1 | Hs.368525 | NM_020992 | 9124   | 1 | TC10001549.hg.1 | 1 | NM_020992                                                      |
| PNKP   | Hs.78016  | NM_007254 | 11284  | 1 | TC19001727.hg.1 | 1 | NM_007254                                                      |
| PRDX1  | Hs.180909 | NM_002574 | 5052   | 1 | TC01002611.hg.1 | 2 | NM_002574; NM_181697                                           |
| PRDX2  | Hs.432121 | NM_005809 | 7001   | 1 | TC19001210.hg.1 | 4 | BC003022; BC064138; NM_005809; NM_181738                       |
| PRDX3  | Hs.523302 | NM_006793 | 10935  | 1 | TC10001702.hg.1 | 2 | NM_006793; NM_014098                                           |
| PRDX4  | Hs.83383  | NM_006406 | 10549  | 1 | TC0X000110.hg.1 | 4 | BC003609; BC007107; BC016770; NM_006406                        |
| PRDX5  | Hs.502823 | NM_181652 | 25824  | 1 | TC11000597.hg.1 | 2 | NM_012094; NM_181651                                           |
| PRDX6  | Hs.120    | NM_004905 | 9588   | 1 | TC01001510.hg.1 | 1 | NM_004905                                                      |
| PREX1  | Hs.153310 | NM_020820 | 57580  | 1 | TC20000920.hg.1 | 1 | NM_020820                                                      |
| PRNP   | Hs.472010 | NM_183079 | 5621   | 1 | TC20000051.hg.1 | 1 | NM_000311                                                      |
| PTGS1  | Hs.201978 | NM_000962 | 5742   | 1 | TC09000614.hg.1 | 3 | BC029840; DQ180741; NM_000962                                  |
| PTGS2  | Hs.196384 | NM_000963 | 5743   | 1 | TC01003638.hg.1 | 4 | AJ634912; AY151286; BC013734; NM_000963                        |
| PXDN   | Hs.332197 | NM_012293 | 7837   | 1 | TC02001512.hg.1 | 4 | XM_056455; XM_935180; XM_935181; XM_935183                     |
| RNF7   | Hs.134623 | NM_014245 | 9616   | 1 | TC03000764.hg.1 | 4 | AF312226; BC005966; NM_014245; NM_183063                       |
| SCARA3 | Hs.128856 | NM_182826 | 51435  | 1 | TC08000209.hg.1 | 3 | BC075067; NM_016240; NM_182826                                 |
| SELS   | Hs.32148  | NM_203472 | 55829  | 1 | TC20000544.hg.1 | 2 | NM_018445; NM_203472                                           |
| SEPP1  | Hs.275775 | NM_005410 | 6414   | 1 | TC15002006.hg.1 | 2 | BC058919; NM_005410                                            |
| SFTPD  | Hs.253495 | NM_003019 | 6441   | 1 | TC05001310.hg.1 | 1 | NM_003019                                                      |
| SIRT2  | Hs.466693 | NM_012237 | 22933  | 1 | TC10001458.hg.1 | 3 | AK131390; CR617711; NM_012237                                  |
| SOD1   | Hs.443914 | NM_000454 | 6647   | 1 | TC19001508.hg.1 | 2 | BC001034; NM_000454                                            |
| SOD2   | Hs.487046 | NM_000636 | 6648   | 2 | TC21000111.hg.1 | 3 | BC016934; NM_000636; NM_001024465                              |
| SOD3   | Hs.2420   | NM_003102 | 6649   | 1 | TC06004141.hg.1 | 2 | BC014418; NM_003102                                            |
| SQSTM1 | Hs.437277 | NM_003900 | 8878   | 1 | TC04000173.hg.1 | 2 | BC001874; NM_003900                                            |
| SRXN1  | Hs.516830 | NM_080725 | 140809 | 1 | TC05001053.hg.1 | 1 | NM_080725                                                      |
| STK25  | Hs.516807 | NM_006374 | 10494  | 1 | TC02002951.hg.1 | 2 | BC015793; NM_006374                                            |

|        |           |           |       |   |                 |   |                                 |
|--------|-----------|-----------|-------|---|-----------------|---|---------------------------------|
| TPO    | Hs.467554 | NM_000547 | 7173  | 1 | TC02000013.hg.1 | 3 | NM_000547; NM_175719; NM_175720 |
| TTN    | Hs.134602 | NM_003319 | 7273  | 1 | TC02005047.hg.1 | 3 | BC013396; NM_003319; NM_133379  |
| TXN    | Hs.435136 | NM_003329 | 7295  | 1 | TC09001473.hg.1 | 3 | BC003377; BX647247; NM_003329   |
| TXNRD1 | Hs.728817 | NM_003330 | 7296  | 1 | TC12000810.hg.1 | 1 | NM_003330                       |
| TXNRD2 | Hs.443430 | NM_006440 | 10587 | 1 | TC22000502.hg.1 | 3 | AF201385; BX957216; NM_006440   |
| UCP2   | Hs.80658  | NM_003355 | 7351  | 1 | TC11002074.hg.1 | 1 | NM_003355                       |

**Supplementary Table 2.** Expression fold changes of 86 genes represented by 166 transcript clusters belonging to oxidative stress related pathways analyzed in U937 cells exposed to different gravitational conditions during the sounding rocket experiment TEXUS-49. Analysis was made with NimbleGen expression microarray.

|                |             | $\mu\text{g vs}$<br>BL-TX hyp-g |        | BL-TX hyp-g vs<br>H/W 1g GC |        | $\mu\text{g vs}$<br>H/W 1g GC |        |
|----------------|-------------|---------------------------------|--------|-----------------------------|--------|-------------------------------|--------|
| gene<br>symbol | probeset ID | p-value                         | FC     | p-value                     | FC     | p-value                       | FC     |
| ALB            | BC034023    | 0.665                           | -1.054 | 0.981                       | -1.003 | 0.600                         | -1.057 |
| ALB            | BC035969    | 0.258                           | -1.065 | 0.699                       | 1.029  | 0.647                         | -1.035 |
| ALB            | BC041789    | 0.494                           | 1.074  | 0.090                       | -1.310 | 0.050                         | -1.219 |
| ALB            | NM_000477   | 0.114                           | 1.218  | 0.143                       | -1.130 | 0.475                         | 1.078  |
| ALOX12         | BC069557    | 0.491                           | -1.130 | 0.795                       | 1.087  | 0.891                         | -1.039 |
| ALOX12         | NM_000697   | 0.004                           | 1.537  | 0.014                       | -1.602 | 0.707                         | -1.042 |
| AOX1           | NM_001159   | 0.089                           | -1.250 | 0.101                       | 1.251  | 0.992                         | 1.001  |
| APOE           | NM_000041   | 0.284                           | 1.388  | 0.940                       | -1.016 | 0.260                         | 1.367  |
| ATOX1          | BC112248    | 0.163                           | -1.170 | 0.796                       | 1.027  | 0.247                         | -1.140 |
| ATOX1          | NM_004045   | 0.193                           | -1.160 | 0.078                       | -1.212 | 0.015                         | -1.406 |
| BNIP3          | BC021989    | 0.064                           | -1.246 | 0.005                       | 1.273  | 0.855                         | 1.022  |
| BNIP3          | NM_004052   | 0.291                           | -1.246 | 0.066                       | 1.490  | 0.255                         | 1.196  |
| CAT            | BC112217    | 0.080                           | -1.369 | 0.001                       | 1.530  | 0.571                         | 1.118  |
| CAT            | NM_001752   | 0.064                           | -1.260 | 0.001                       | 1.378  | 0.506                         | 1.093  |
| CCL5           | BC008600    | 0.535                           | 1.029  | 0.590                       | -1.038 | 0.861                         | -1.010 |
| CCL5           | NM_002985   | 0.464                           | -1.034 | 0.492                       | 1.043  | 0.847                         | 1.009  |
| CCS            | BC105016    | 0.552                           | -1.172 | 0.192                       | -1.357 | 0.056                         | -1.590 |
| CCS            | NM_005125   | 0.499                           | -1.109 | 0.067                       | -1.346 | 0.017                         | -1.493 |

|        |           |       |        |       |        |       |        |
|--------|-----------|-------|--------|-------|--------|-------|--------|
| CYBA   | BC006465  | 0.691 | 1.027  | 0.608 | -1.053 | 0.762 | -1.026 |
| CYBA   | NM_000101 | 0.244 | 1.061  | 0.335 | -1.055 | 0.896 | 1.006  |
| CYBB   | BC032720  | 0.060 | -1.972 | 0.009 | 1.819  | 0.850 | -1.084 |
| CYBB   | NM_000397 | 0.077 | -1.957 | 0.010 | 1.794  | 0.841 | -1.091 |
| CYGB   | NM_134268 | 0.225 | 1.860  | 0.954 | -1.015 | 0.189 | 1.833  |
| DHCR24 | BC004375  | 0.114 | -1.163 | 0.932 | 1.007  | 0.176 | -1.154 |
| DHCR24 | NM_014762 | 0.181 | -1.161 | 0.918 | 1.010  | 0.206 | -1.150 |
| DUOX1  | NM_017434 | 0.075 | 3.304  | 0.287 | -1.891 | 0.253 | 1.747  |
| DUOX2  | AF230496  | 0.115 | 2.070  | 0.320 | -1.444 | 0.312 | 1.434  |
| DUOX2  | NM_014080 | 0.130 | 3.682  | 0.313 | -2.961 | 0.727 | 1.244  |
| DUSP1  | NM_004417 | 0.338 | -1.366 | 0.856 | 1.050  | 0.432 | -1.300 |
| EPHX2  | NM_001979 | 0.186 | 2.134  | 0.241 | -2.713 | 0.655 | -1.272 |
| EPX    | NM_000502 | 0.800 | -1.131 | 0.656 | 1.279  | 0.499 | 1.131  |
| FOXM1  | BC006192  | 0.309 | -1.133 | 0.472 | 1.118  | 0.931 | -1.013 |
| FOXM1  | NM_021953 | 0.279 | -1.143 | 0.605 | 1.078  | 0.683 | -1.060 |
| FOXM1  | NM_202003 | 0.206 | -1.161 | 0.481 | 1.085  | 0.570 | -1.070 |
| FTH1   | BC000857  | 0.181 | -1.140 | 0.148 | 1.235  | 0.446 | 1.084  |
| FTH1   | BC066341  | 0.637 | -1.046 | 0.203 | 1.241  | 0.152 | 1.187  |
| FTH1   | NM_002032 | 0.112 | -1.144 | 0.053 | 1.330  | 0.098 | 1.162  |
| GCLC   | BC039894  | 0.112 | -1.995 | 0.004 | 3.699  | 0.344 | 1.855  |
| GCLC   | NM_001498 | 0.096 | -1.999 | 0.009 | 3.329  | 0.366 | 1.665  |
| GCLM   | BC041809  | 0.046 | -2.118 | 0.001 | 2.711  | 0.633 | 1.280  |
| GCLM   | NM_002061 | 0.065 | -2.094 | 0.000 | 4.220  | 0.277 | 2.015  |
| GPX1   | BC000742  | 0.259 | -1.054 | 0.122 | 1.057  | 0.939 | 1.003  |
| GPX1   | NM_000581 | 0.150 | -1.055 | 0.451 | 1.037  | 0.627 | -1.018 |
| GPX1   | NM_201397 | 0.253 | -1.052 | 0.158 | 1.064  | 0.794 | 1.011  |
| GPX2   | BC005277  | 0.126 | 2.416  | 0.116 | -1.865 | 0.522 | 1.295  |
| GPX2   | NM_002083 | 0.099 | 1.473  | 0.061 | -1.477 | 0.987 | -1.003 |
| GPX3   | BC050378  | 0.317 | 1.770  | 0.165 | -1.273 | 0.478 | 1.391  |
| GPX3   | NM_002084 | 0.533 | 1.175  | 0.761 | -1.041 | 0.588 | 1.128  |



|           |              |       |        |       |        |       |        |
|-----------|--------------|-------|--------|-------|--------|-------|--------|
| GPX4      | NM_001039847 | 0.281 | 1.081  | 0.010 | 1.313  | 0.003 | 1.419  |
| GPX4      | NM_001039848 | 0.335 | 1.064  | 0.014 | 1.265  | 0.001 | 1.346  |
| GPX5      | NM_001509    | 0.276 | 1.157  | 0.291 | -1.295 | 0.575 | -1.119 |
| GPX5      | NM_003996    | 0.383 | 1.132  | 0.016 | -1.741 | 0.017 | -1.538 |
| GPX6      | NM_182701    | 0.141 | 2.515  | 0.291 | -1.886 | 0.566 | 1.334  |
| GPX7      | BC032788     | 0.001 | 1.414  | 0.155 | -1.333 | 0.668 | 1.061  |
| GPX7      | NM_015696    | 0.354 | 1.149  | 0.559 | -1.097 | 0.746 | 1.047  |
| GSR       | BC069244     | 0.043 | -1.394 | 0.004 | 1.632  | 0.356 | 1.170  |
| GSR       | NM_000637    | 0.047 | -1.625 | 0.007 | 1.831  | 0.655 | 1.127  |
| GSS       | NM_000178    | 0.695 | 1.044  | 0.005 | -1.296 | 0.018 | -1.242 |
| GSTP1     | BC010915     | 0.118 | -1.058 | 0.385 | 1.021  | 0.245 | -1.037 |
| GSTP1     | NM_000852    | 0.833 | -1.009 | 0.919 | -1.005 | 0.733 | -1.014 |
| GSTZ1     | BC001453     | 0.071 | -1.221 | 0.374 | -1.108 | 0.032 | -1.352 |
| GSTZ1     | NM_001513    | 0.204 | -1.127 | 0.132 | -1.138 | 0.017 | -1.282 |
| GSTZ1     | NM_145870    | 0.162 | -1.202 | 0.523 | -1.089 | 0.105 | -1.308 |
| GTF2I     | BC004472     | 0.138 | -1.670 | 0.123 | 1.481  | 0.743 | -1.128 |
| GTF2I     | NM_001518    | 0.059 | -1.378 | 0.001 | 1.643  | 0.306 | 1.192  |
| HMOX1     | BC001491     | 0.151 | -1.360 | 0.973 | -1.009 | 0.265 | -1.372 |
| HMOX1     | NM_002133    | 0.221 | -1.357 | 0.677 | -1.115 | 0.173 | -1.513 |
| HSPA1A    | AK096017     | 0.115 | -1.263 | 0.020 | 1.439  | 0.342 | 1.139  |
| HSPA1A    | BC009322     | 0.087 | -1.536 | 0.067 | 1.521  | 0.972 | -1.010 |
| HSPA1A    | NM_005345    | 0.168 | -1.208 | 0.128 | 1.250  | 0.792 | 1.035  |
| KRT1      | BC063697     | 0.075 | 1.642  | 0.039 | -1.529 | 0.717 | 1.074  |
| KRT1      | NM_006121    | 0.140 | 2.609  | 0.418 | -1.769 | 0.457 | 1.475  |
| LOC653361 | XM_928908    | 0.045 | 1.727  | 0.084 | -1.357 | 0.273 | 1.273  |
| LPO       | BC107166     | 0.125 | 1.691  | 0.093 | -1.388 | 0.468 | 1.219  |
| LPO       | NM_006151    | 0.750 | 1.048  | 0.869 | -1.030 | 0.912 | 1.017  |
| MB        | BC018001     | 0.188 | 2.150  | 0.294 | -1.560 | 0.438 | 1.378  |
| MB        | NM_005368    | 0.075 | 1.826  | 0.075 | -1.666 | 0.727 | 1.096  |
| MB        | NM_203377    | 0.757 | 1.116  | 0.790 | -1.113 | 0.992 | 1.003  |

|       |           |       |        |       |        |       |        |
|-------|-----------|-------|--------|-------|--------|-------|--------|
| MB    | NM_203378 | 0.114 | 1.922  | 0.043 | -1.933 | 0.985 | -1.006 |
| MBL2  | BC069338  | 0.406 | 1.226  | 0.438 | -1.210 | 0.948 | 1.013  |
| MBL2  | NM_000242 | 0.225 | 1.361  | 0.184 | -1.117 | 0.348 | 1.219  |
| MGST3 | CR607567  | 0.856 | -1.022 | 0.061 | 1.367  | 0.016 | 1.338  |
| MGST3 | NM_004528 | 0.671 | -1.068 | 0.129 | 1.349  | 0.024 | 1.263  |
| MPO   | NM_000250 | 0.301 | 1.296  | 0.111 | -1.212 | 0.751 | 1.069  |
| MPO   | X04876    | 0.062 | 2.308  | 0.083 | -1.547 | 0.237 | 1.492  |
| MPV17 | NM_002437 | 0.232 | 1.062  | 0.035 | 1.126  | 0.001 | 1.196  |
| MSRA  | AY958431  | 0.034 | -1.535 | 0.002 | 1.517  | 0.958 | -1.012 |
| MSRA  | BC054033  | 0.036 | -1.493 | 0.008 | 1.474  | 0.951 | -1.013 |
| MSRA  | NM_012331 | 0.020 | -1.555 | 0.003 | 1.526  | 0.924 | -1.019 |
| MT3   | BC013081  | 0.043 | 1.808  | 0.002 | -1.789 | 0.958 | 1.010  |
| MT3   | NM_005954 | 0.527 | -1.101 | 0.873 | 1.027  | 0.700 | -1.072 |
| NCF1  | NM_000265 | 0.037 | 1.328  | 0.056 | -1.249 | 0.591 | 1.064  |
| NCF2  | BC001606  | 0.084 | -1.530 | 0.811 | -1.052 | 0.103 | -1.610 |
| NCF2  | NM_000433 | 0.283 | -1.306 | 0.471 | -1.190 | 0.079 | -1.554 |
| NCF4  | NM_000631 | 0.143 | -1.249 | 0.078 | -1.238 | 0.009 | -1.546 |
| NOS2A | NM_000625 | 0.132 | 2.274  | 0.157 | -1.345 | 0.224 | 1.690  |
| NOX4  | AJ704727  | 0.204 | 1.204  | 0.092 | -1.289 | 0.608 | -1.071 |
| NOX4  | BC040105  | 0.172 | 1.307  | 0.198 | -1.169 | 0.526 | 1.118  |
| NOX4  | BC051371  | 0.482 | -1.075 | 0.444 | -1.126 | 0.165 | -1.210 |
| NOX4  | NM_016931 | 0.758 | 1.012  | 0.255 | -1.117 | 0.246 | -1.103 |
| NOX5  | AK074071  | 0.122 | 2.715  | 0.389 | -1.661 | 0.324 | 1.635  |
| NOX5  | NM_024505 | 0.905 | -1.035 | 0.370 | 1.350  | 0.281 | 1.304  |
| NQO1  | BC007659  | 0.063 | -1.222 | 0.020 | 1.267  | 0.757 | 1.037  |
| NQO1  | NM_000903 | 0.054 | -1.980 | 0.000 | 3.973  | 0.234 | 2.007  |
| NUDT1 | BC014618  | 0.295 | 1.122  | 0.037 | -1.216 | 0.436 | -1.084 |
| NUDT1 | BC065367  | 0.665 | 1.050  | 0.001 | -1.222 | 0.133 | -1.165 |
| NUDT1 | NM_002452 | 0.883 | 1.017  | 0.038 | -1.226 | 0.126 | -1.205 |
| NUDT1 | NM_198948 | 0.514 | 1.062  | 0.009 | -1.209 | 0.144 | -1.138 |

|        |           |       |        |       |        |       |        |
|--------|-----------|-------|--------|-------|--------|-------|--------|
| NUDT1  | NM_198949 | 0.433 | 1.107  | 0.021 | -1.261 | 0.285 | -1.139 |
| NUDT1  | NM_198953 | 0.350 | 1.132  | 0.049 | -1.210 | 0.579 | -1.069 |
| OXR1   | AB075503  | 0.584 | -1.167 | 0.055 | 1.756  | 0.111 | 1.505  |
| OXR1   | AF309387  | 0.613 | -1.067 | 0.993 | 1.002  | 0.784 | -1.064 |
| OXR1   | AK096148  | 0.507 | 1.042  | 0.252 | -1.109 | 0.343 | -1.064 |
| OXR1   | BC032710  | 0.054 | -1.657 | 0.003 | 2.214  | 0.262 | 1.336  |
| OXR1   | NM_181354 | 0.144 | -1.258 | 0.056 | 1.317  | 0.651 | 1.047  |
| OXSR1  | BC008726  | 0.034 | -1.701 | 0.005 | 1.530  | 0.708 | -1.111 |
| OXSR1  | NM_005109 | 0.051 | -1.587 | 0.007 | 1.496  | 0.824 | -1.060 |
| PDLIM1 | NM_020992 | 0.103 | 2.648  | 0.201 | -2.811 | 0.904 | -1.062 |
| PNKP   | NM_007254 | 0.262 | 1.146  | 0.006 | -1.343 | 0.123 | -1.172 |
| PRDX1  | NM_002574 | 0.948 | -1.005 | 0.976 | -1.003 | 0.921 | -1.008 |
| PRDX1  | NM_181697 | 0.083 | -1.153 | 0.558 | -1.048 | 0.020 | -1.208 |
| PRDX2  | BC003022  | 0.033 | 1.062  | 0.805 | 1.011  | 0.075 | 1.074  |
| PRDX2  | BC064138  | 0.051 | 1.137  | 0.228 | -1.071 | 0.312 | 1.061  |
| PRDX2  | NM_005809 | 0.148 | 1.079  | 0.743 | -1.032 | 0.588 | 1.045  |
| PRDX2  | NM_181738 | 0.462 | 1.040  | 0.458 | 1.047  | 0.159 | 1.089  |
| PRDX3  | NM_006793 | 0.026 | -1.291 | 0.003 | 1.459  | 0.301 | 1.130  |
| PRDX3  | NM_014098 | 0.055 | -1.381 | 0.009 | 1.616  | 0.228 | 1.170  |
| PRDX4  | BC003609  | 0.017 | -1.417 | 0.002 | 1.567  | 0.435 | 1.106  |
| PRDX4  | BC007107  | 0.019 | -1.468 | 0.001 | 1.611  | 0.542 | 1.097  |
| PRDX4  | BC016770  | 0.033 | -1.419 | 0.003 | 1.590  | 0.451 | 1.120  |
| PRDX4  | NM_006406 | 0.042 | -1.356 | 0.001 | 1.545  | 0.345 | 1.140  |
| PRDX5  | NM_012094 | 0.757 | 1.007  | 0.001 | -1.104 | 0.003 | -1.096 |
| PRDX5  | NM_181651 | 0.197 | 1.094  | 0.558 | -1.049 | 0.574 | 1.043  |
| PRDX6  | NM_004905 | 0.496 | -1.062 | 0.031 | 1.248  | 0.153 | 1.175  |
| PREX1  | NM_020820 | 0.142 | -1.219 | 0.034 | 1.359  | 0.460 | 1.116  |
| PRNP   | NM_000311 | 0.013 | -2.237 | 0.000 | 2.233  | 0.997 | -1.001 |
| PTGS1  | BC029840  | 0.209 | -1.226 | 0.559 | 1.092  | 0.469 | -1.123 |
| PTGS1  | DQ180741  | 0.257 | -1.230 | 0.713 | 1.061  | 0.402 | -1.159 |

|        |              |       |        |       |        |       |        |
|--------|--------------|-------|--------|-------|--------|-------|--------|
| PTGS1  | NM_000962    | 0.052 | -1.367 | 0.005 | 1.356  | 0.963 | -1.008 |
| PTGS2  | AJ634912     | 0.110 | -1.746 | 0.009 | 2.253  | 0.481 | 1.291  |
| PTGS2  | AY151286     | 0.149 | -1.147 | 0.015 | 1.223  | 0.456 | 1.066  |
| PTGS2  | BC013734     | 0.202 | -1.301 | 0.029 | 1.520  | 0.387 | 1.168  |
| PTGS2  | NM_000963    | 0.008 | -1.482 | 0.003 | 1.556  | 0.679 | 1.050  |
| PXDN   | XM_056455    | 0.101 | 2.370  | 0.245 | -2.258 | 0.917 | 1.049  |
| PXDN   | XM_935180    | 0.098 | 4.521  | 0.267 | -4.316 | 0.944 | 1.047  |
| PXDN   | XM_935181    | 0.333 | 1.071  | 0.123 | -1.145 | 0.426 | -1.069 |
| PXDN   | XM_935183    | 0.040 | 2.630  | 0.178 | -2.767 | 0.910 | -1.052 |
| RNF7   | AF312226     | 0.088 | -1.419 | 0.305 | 1.184  | 0.237 | -1.198 |
| RNF7   | BC005966     | 0.067 | -1.447 | 0.253 | 1.219  | 0.248 | -1.187 |
| RNF7   | NM_014245    | 0.086 | -1.407 | 0.239 | 1.233  | 0.347 | -1.141 |
| RNF7   | NM_183063    | 0.055 | -1.453 | 0.182 | 1.234  | 0.276 | -1.177 |
| SCARA3 | BC075067     | 0.091 | 2.972  | 0.187 | -2.763 | 0.882 | 1.076  |
| SCARA3 | NM_016240    | 0.081 | 3.008  | 0.204 | -1.771 | 0.248 | 1.699  |
| SCARA3 | NM_182826    | 0.165 | 1.344  | 0.090 | -1.197 | 0.503 | 1.123  |
| SELS   | NM_018445    | 0.177 | -1.305 | 0.070 | 1.501  | 0.309 | 1.150  |
| SELS   | NM_203472    | 0.041 | -1.856 | 0.016 | 1.731  | 0.849 | -1.072 |
| SEPP1  | BC058919     | 0.098 | -1.541 | 0.212 | 1.361  | 0.618 | -1.132 |
| SEPP1  | NM_005410    | 0.676 | -1.184 | 0.325 | 1.302  | 0.820 | 1.100  |
| SFTPD  | NM_003019    | 0.150 | -1.519 | 0.480 | 1.263  | 0.477 | -1.203 |
| SIRT2  | AK131390     | 0.757 | -1.024 | 0.225 | -1.131 | 0.145 | -1.158 |
| SIRT2  | CR617711     | 0.176 | -1.143 | 0.416 | -1.068 | 0.037 | -1.220 |
| SIRT2  | NM_012237    | 0.730 | -1.028 | 0.164 | -1.125 | 0.078 | -1.156 |
| SOD1   | BC001034     | 0.907 | 1.014  | 0.300 | 1.171  | 0.077 | 1.188  |
| SOD1   | NM_000454    | 0.016 | -2.099 | 0.000 | 2.429  | 0.701 | 1.157  |
| SOD2   | BC016934     | 0.513 | -1.062 | 0.108 | -1.552 | 0.035 | -1.648 |
| SOD2   | NM_000636    | 0.059 | -2.408 | 0.021 | 2.517  | 0.933 | 1.045  |
| SOD2   | NM_001024465 | 0.014 | -1.547 | 0.130 | 1.187  | 0.087 | -1.303 |
| SOD3   | BC014418     | 0.266 | 1.911  | 0.482 | -1.487 | 0.543 | 1.285  |

|        |           |       |        |       |        |       |        |
|--------|-----------|-------|--------|-------|--------|-------|--------|
| SOD3   | NM_003102 | 0.024 | 1.645  | 0.111 | -1.553 | 0.775 | 1.059  |
| SQSTM1 | BC001874  | 0.494 | -1.031 | 0.822 | 1.014  | 0.775 | -1.016 |
| SQSTM1 | NM_003900 | 0.277 | 1.158  | 0.676 | -1.049 | 0.467 | 1.105  |
| SRXN1  | NM_080725 | 0.148 | -1.380 | 0.714 | -1.067 | 0.077 | -1.471 |
| STK25  | BC015793  | 0.190 | 1.129  | 0.860 | -1.025 | 0.318 | 1.102  |
| STK25  | NM_006374 | 0.281 | 1.076  | 0.210 | 1.116  | 0.059 | 1.201  |
| TPO    | NM_000547 | 0.110 | 3.282  | 0.270 | -4.734 | 0.622 | -1.442 |
| TPO    | NM_175719 | 0.091 | 3.939  | 0.188 | -3.875 | 0.977 | 1.016  |
| TPO    | NM_175720 | 0.109 | 2.697  | 0.249 | -3.815 | 0.598 | -1.415 |
| TTN    | BC013396  | 0.109 | 3.147  | 0.241 | -2.377 | 0.585 | 1.324  |
| TTN    | NM_003319 | 0.176 | -1.281 | 0.399 | 1.172  | 0.456 | -1.093 |
| TTN    | NM_133379 | 0.307 | 1.104  | 0.076 | -1.925 | 0.058 | -1.743 |
| TXN    | BC003377  | 0.427 | -1.194 | 0.632 | 1.152  | 0.837 | -1.036 |
| TXN    | BX647247  | 0.088 | -1.646 | 0.295 | 1.319  | 0.146 | -1.248 |
| TXN    | NM_003329 | 0.384 | -1.210 | 0.595 | 1.166  | 0.825 | -1.037 |
| TXNRD1 | NM_003330 | 0.102 | -1.888 | 0.006 | 2.245  | 0.735 | 1.189  |
| TXNRD2 | AF201385  | 0.203 | 2.342  | 0.945 | -1.013 | 0.166 | 2.312  |
| TXNRD2 | BX957216  | 0.368 | 1.257  | 0.769 | -1.072 | 0.557 | 1.173  |
| TXNRD2 | NM_006440 | 0.642 | 1.046  | 0.237 | -1.131 | 0.329 | -1.081 |
| UCP2   | NM_003355 | 0.523 | -1.037 | 0.661 | -1.032 | 0.266 | -1.070 |

**Supplementary Table 3.** Expression fold changes of 86 genes represented by 166 transcript clusters belonging to oxidative stress related pathways analyzed in U937 cells exposed to different gravitational conditions during parabolic flight (19<sup>th</sup> DLR PFC). Analysis was made with NimbleGen expression microarray.

|                |             | 1g IF vs<br>H/W 1g GC |        | BL-PFC hyp-g vs<br>1g IF |        | $\mu$ g vs<br>BL-PFC hyp-g |        | $\mu$ g vs<br>1g IF |        | BL-PFC hyp-g vs<br>H/W 1g GC |        | $\mu$ g vs<br>H/W 1g GC |        |
|----------------|-------------|-----------------------|--------|--------------------------|--------|----------------------------|--------|---------------------|--------|------------------------------|--------|-------------------------|--------|
| gene<br>symbol | probeset ID | p-value               | FC     | p-value                  | FC     | p-value                    | FC     | p-value             | FC     | p-value                      | FC     | p-value                 | FC     |
| ALB            | BC034023    | 0.211                 | -1.065 | 0.366                    | 1.031  | 0.245                      | -1.030 | 0.968               | 1.001  | 0.543                        | -1.033 | 0.170                   | -1.064 |
| ALB            | BC035969    | 0.355                 | -1.043 | 0.992                    | -1.000 | 0.534                      | -1.022 | 0.465               | -1.022 | 0.424                        | -1.043 | 0.157                   | -1.066 |
| ALB            | BC041789    | 0.603                 | -1.064 | 0.436                    | 1.091  | 0.425                      | -1.055 | 0.711               | 1.034  | 0.803                        | 1.025  | 0.713                   | -1.029 |
| ALB            | NM_000477   | 0.967                 | -1.002 | 0.833                    | -1.006 | 0.516                      | 1.012  | 0.831               | 1.006  | 0.815                        | -1.008 | 0.892                   | 1.004  |
| ALOX12         | BC069557    | 0.956                 | -1.009 | 0.063                    | -1.371 | 0.287                      | 1.138  | 0.120               | -1.205 | 0.127                        | -1.384 | 0.202                   | -1.217 |
| ALOX12         | NM_000697   | 0.150                 | 1.114  | 0.864                    | 1.029  | 0.378                      | -1.179 | 0.126               | -1.145 | 0.495                        | 1.147  | 0.745                   | -1.028 |
| AOX1           | NM_001159   | 0.374                 | 1.126  | 0.861                    | 1.029  | 0.483                      | -1.150 | 0.500               | -1.117 | 0.388                        | 1.159  | 0.964                   | 1.008  |
| APOE           | NM_000041   | 0.195                 | -1.212 | 0.570                    | 1.085  | 0.996                      | 1.001  | 0.480               | 1.086  | 0.511                        | -1.117 | 0.423                   | -1.117 |
| ATOX1          | BC112248    | 0.362                 | 1.094  | 0.408                    | -1.127 | 0.636                      | 1.074  | 0.610               | -1.050 | 0.852                        | -1.031 | 0.694                   | 1.042  |
| ATOX1          | NM_004045   | 0.626                 | 1.053  | 0.737                    | -1.041 | 0.502                      | -1.085 | 0.289               | -1.130 | 0.913                        | 1.012  | 0.513                   | -1.072 |
| BNIP3          | BC021989    | 0.886                 | 1.019  | 0.727                    | -1.053 | 0.874                      | -1.022 | 0.563               | -1.076 | 0.819                        | -1.033 | 0.652                   | -1.056 |
| BNIP3          | NM_004052   | 0.098                 | 1.228  | 0.194                    | -1.146 | 0.745                      | -1.040 | 0.054               | -1.192 | 0.670                        | 1.072  | 0.826                   | 1.031  |
| CAT            | BC112217    | 0.002                 | -1.323 | 0.021                    | -1.220 | 0.186                      | 1.140  | 0.335               | -1.070 | 0.001                        | -1.614 | 0.001                   | -1.415 |
| CAT            | NM_001752   | 0.001                 | -1.241 | 0.013                    | -1.218 | 0.104                      | 1.148  | 0.207               | -1.061 | 0.001                        | -1.511 | 0.000                   | -1.317 |
| CCL5           | BC008600    | 0.008                 | 1.157  | 0.052                    | -1.119 | 0.464                      | 1.049  | 0.201               | -1.067 | 0.598                        | 1.034  | 0.185                   | 1.084  |
| CCL5           | NM_002985   | 0.011                 | 1.208  | 0.006                    | -1.180 | 0.220                      | 1.077  | 0.095               | -1.096 | 0.740                        | 1.024  | 0.187                   | 1.103  |
| CCS            | BC105016    | 0.690                 | -1.079 | 0.163                    | -1.391 | 0.382                      | 1.312  | 0.786               | -1.060 | 0.162                        | -1.501 | 0.599                   | -1.144 |
| CCS            | NM_005125   | 0.735                 | -1.051 | 0.589                    | -1.107 | 0.799                      | 1.068  | 0.866               | -1.036 | 0.402                        | -1.163 | 0.699                   | -1.089 |
| CYBA           | BC006465    | 0.135                 | 1.161  | 0.009                    | -1.382 | 0.016                      | 1.338  | 0.574               | -1.033 | 0.288                        | -1.190 | 0.228                   | 1.124  |

|        |              |       |        |       |        |       |        |       |        |       |        |       |        |
|--------|--------------|-------|--------|-------|--------|-------|--------|-------|--------|-------|--------|-------|--------|
| CYBA   | NM_000101    | 0.061 | 1.195  | 0.007 | -1.411 | 0.037 | 1.284  | 0.095 | -1.099 | 0.301 | -1.181 | 0.343 | 1.087  |
| CYBB   | BC032720     | 0.981 | -1.003 | 0.004 | -1.819 | 0.129 | 1.366  | 0.034 | -1.332 | 0.017 | -1.825 | 0.075 | -1.336 |
| CYBB   | NM_000397    | 0.948 | 1.009  | 0.004 | -1.808 | 0.159 | 1.362  | 0.057 | -1.328 | 0.011 | -1.793 | 0.102 | -1.316 |
| CYGB   | NM_134268    | 0.240 | 1.238  | 0.906 | 1.019  | 0.701 | -1.047 | 0.845 | -1.027 | 0.153 | 1.262  | 0.152 | 1.205  |
| DHCR24 | BC004375     | 0.443 | 1.044  | 0.284 | -1.084 | 0.550 | 1.047  | 0.232 | -1.035 | 0.718 | -1.038 | 0.892 | 1.008  |
| DHCR24 | NM_014762    | 0.284 | 1.094  | 0.040 | -1.158 | 0.350 | 1.065  | 0.056 | -1.087 | 0.621 | -1.058 | 0.943 | 1.006  |
| DUOX1  | NM_017434    | 0.464 | -1.104 | 0.060 | 1.634  | 0.211 | -1.437 | 0.562 | 1.138  | 0.157 | 1.480  | 0.900 | 1.030  |
| DUOX2  | AF230496     | 0.120 | 1.388  | 0.313 | 1.250  | 0.662 | -1.107 | 0.503 | 1.130  | 0.075 | 1.736  | 0.074 | 1.569  |
| DUOX2  | NM_014080    | 0.261 | 1.260  | 0.075 | 1.514  | 0.072 | -1.479 | 0.868 | 1.024  | 0.037 | 1.908  | 0.153 | 1.290  |
| DUSP1  | NM_004417    | 0.560 | 1.174  | 0.533 | 1.321  | 0.492 | -1.430 | 0.829 | -1.082 | 0.406 | 1.552  | 0.841 | 1.085  |
| EPHX2  | NM_001979    | 0.377 | 1.204  | 0.007 | 1.941  | 0.213 | -1.384 | 0.181 | 1.402  | 0.011 | 2.338  | 0.125 | 1.689  |
| EPX    | NM_000502    | 0.404 | 1.287  | 0.120 | 1.725  | 0.344 | -1.334 | 0.299 | 1.293  | 0.069 | 2.219  | 0.076 | 1.664  |
| FOXM1  | BC006192     | 0.056 | -1.169 | 0.025 | -1.339 | 0.228 | 1.161  | 0.038 | -1.153 | 0.006 | -1.564 | 0.002 | -1.348 |
| FOXM1  | NM_021953    | 0.051 | -1.186 | 0.016 | -1.363 | 0.177 | 1.161  | 0.033 | -1.174 | 0.002 | -1.617 | 0.001 | -1.393 |
| FOXM1  | NM_202003    | 0.085 | -1.152 | 0.015 | -1.333 | 0.174 | 1.139  | 0.033 | -1.171 | 0.002 | -1.536 | 0.000 | -1.348 |
| FTH1   | BC000857     | 0.935 | -1.007 | 0.024 | 1.260  | 0.185 | -1.178 | 0.556 | 1.070  | 0.034 | 1.251  | 0.628 | 1.062  |
| FTH1   | BC066341     | 0.888 | 1.012  | 0.014 | 1.267  | 0.170 | -1.123 | 0.126 | 1.128  | 0.019 | 1.282  | 0.125 | 1.141  |
| FTH1   | NM_002032    | 0.837 | -1.020 | 0.030 | 1.245  | 0.275 | -1.123 | 0.304 | 1.109  | 0.071 | 1.221  | 0.456 | 1.087  |
| GCLC   | BC039894     | 0.128 | -1.644 | 0.252 | -1.523 | 0.646 | 1.230  | 0.546 | -1.239 | 0.039 | -2.505 | 0.069 | -2.037 |
| GCLC   | NM_001498    | 0.144 | -1.526 | 0.232 | -1.405 | 0.388 | 1.348  | 0.880 | -1.042 | 0.048 | -2.144 | 0.153 | -1.590 |
| GCLM   | BC041809     | 0.818 | -1.043 | 0.253 | -1.304 | 0.848 | 1.058  | 0.279 | -1.233 | 0.300 | -1.360 | 0.306 | -1.285 |
| GCLM   | NM_002061    | 0.325 | 1.269  | 0.043 | -1.810 | 0.275 | 1.418  | 0.280 | -1.277 | 0.291 | -1.427 | 0.982 | -1.006 |
| GPX1   | BC000742     | 0.057 | -1.077 | 0.236 | 1.043  | 0.391 | -1.057 | 0.813 | -1.014 | 0.345 | -1.033 | 0.186 | -1.093 |
| GPX1   | NM_000581    | 0.051 | -1.152 | 0.365 | 1.064  | 0.551 | -1.054 | 0.901 | 1.010  | 0.316 | -1.082 | 0.142 | -1.141 |
| GPX1   | NM_201397    | 0.071 | -1.143 | 0.171 | 1.099  | 0.523 | -1.053 | 0.588 | 1.044  | 0.565 | -1.039 | 0.280 | -1.095 |
| GPX2   | BC005277     | 0.457 | 1.202  | 0.124 | 1.562  | 0.427 | -1.253 | 0.329 | 1.247  | 0.095 | 1.878  | 0.167 | 1.498  |
| GPX2   | NM_002083    | 0.343 | 1.161  | 0.060 | 1.766  | 0.373 | -1.319 | 0.233 | 1.339  | 0.060 | 2.051  | 0.150 | 1.555  |
| GPX3   | BC050378     | 0.330 | 1.213  | 0.304 | 1.232  | 0.138 | -1.323 | 0.691 | -1.074 | 0.058 | 1.495  | 0.456 | 1.130  |
| GPX3   | NM_002084    | 0.991 | -1.002 | 0.548 | 1.136  | 0.485 | -1.143 | 0.971 | -1.006 | 0.501 | 1.134  | 0.948 | -1.008 |
| GPX4   | NM_001039847 | 0.251 | 1.044  | 0.338 | -1.055 | 0.766 | 1.018  | 0.429 | -1.036 | 0.849 | -1.010 | 0.862 | 1.007  |

|           |              |       |        |       |        |       |        |       |        |       |        |       |        |
|-----------|--------------|-------|--------|-------|--------|-------|--------|-------|--------|-------|--------|-------|--------|
| GPX4      | NM_001039848 | 0.026 | 1.112  | 0.325 | -1.037 | 0.912 | 1.006  | 0.529 | -1.031 | 0.154 | 1.072  | 0.222 | 1.079  |
| GPX5      | NM_001509    | 0.334 | 1.168  | 0.068 | 1.451  | 0.293 | -1.243 | 0.346 | 1.168  | 0.041 | 1.694  | 0.128 | 1.363  |
| GPX5      | NM_003996    | 0.187 | 1.147  | 0.013 | 1.494  | 0.103 | -1.285 | 0.137 | 1.162  | 0.011 | 1.714  | 0.035 | 1.334  |
| GPX6      | NM_182701    | 0.246 | 1.245  | 0.033 | 1.666  | 0.321 | -1.296 | 0.273 | 1.286  | 0.023 | 2.074  | 0.122 | 1.601  |
| GPX7      | BC032788     | 0.206 | 1.313  | 0.203 | 1.288  | 0.647 | -1.095 | 0.382 | 1.177  | 0.039 | 1.691  | 0.066 | 1.545  |
| GPX7      | NM_015696    | 0.491 | 1.164  | 0.023 | 1.752  | 0.210 | -1.375 | 0.282 | 1.274  | 0.028 | 2.039  | 0.181 | 1.483  |
| GSR       | BC069244     | 0.822 | 1.022  | 0.002 | -1.527 | 0.084 | 1.283  | 0.044 | -1.190 | 0.027 | -1.494 | 0.212 | -1.164 |
| GSR       | NM_000637    | 0.426 | 1.093  | 0.004 | -1.542 | 0.140 | 1.228  | 0.013 | -1.256 | 0.067 | -1.412 | 0.240 | -1.150 |
| GSS       | NM_000178    | 0.022 | -1.108 | 0.006 | -1.204 | 0.036 | 1.137  | 0.217 | -1.059 | 0.000 | -1.334 | 0.001 | -1.173 |
| GSTP1     | BC010915     | 0.002 | 1.263  | 0.014 | -1.217 | 0.012 | 1.168  | 0.366 | -1.042 | 0.630 | 1.038  | 0.001 | 1.212  |
| GSTP1     | NM_000852    | 0.002 | 1.164  | 0.008 | -1.179 | 0.023 | 1.198  | 0.736 | 1.016  | 0.858 | -1.013 | 0.017 | 1.183  |
| GSTZ1     | BC001453     | 0.001 | -1.462 | 0.182 | -1.307 | 0.454 | 1.221  | 0.705 | -1.070 | 0.002 | -1.911 | 0.012 | -1.565 |
| GSTZ1     | NM_001513    | 0.000 | -1.319 | 0.138 | -1.162 | 0.834 | 1.030  | 0.300 | -1.128 | 0.000 | -1.532 | 0.002 | -1.487 |
| GSTZ1     | NM_145870    | 0.016 | -1.461 | 0.130 | -1.450 | 0.373 | 1.307  | 0.592 | -1.109 | 0.006 | -2.118 | 0.019 | -1.621 |
| GTF2I     | BC004472     | 0.526 | -1.095 | 0.001 | -2.014 | 0.080 | 1.529  | 0.010 | -1.317 | 0.016 | -2.204 | 0.057 | -1.441 |
| GTF2I     | NM_001518    | 0.925 | 1.008  | 0.106 | -1.117 | 0.931 | 1.007  | 0.122 | -1.109 | 0.330 | -1.108 | 0.324 | -1.100 |
| HMOX1     | BC001491     | 0.238 | 1.621  | 0.108 | 1.877  | 0.599 | -1.247 | 0.358 | 1.505  | 0.031 | 3.042  | 0.139 | 2.439  |
| HMOX1     | NM_002133    | 0.199 | 1.718  | 0.224 | 1.627  | 0.723 | -1.168 | 0.446 | 1.393  | 0.057 | 2.795  | 0.147 | 2.393  |
| HSPA1A    | AK096017     | 0.007 | 1.590  | 0.032 | 1.301  | 0.126 | -1.116 | 0.141 | 1.166  | 0.000 | 2.069  | 0.000 | 1.854  |
| HSPA1A    | BC009322     | 0.006 | 1.823  | 0.058 | 1.346  | 0.073 | -1.198 | 0.327 | 1.124  | 0.000 | 2.454  | 0.000 | 2.049  |
| HSPA1A    | NM_005345    | 0.002 | 1.493  | 0.133 | 1.137  | 0.383 | -1.040 | 0.211 | 1.093  | 0.000 | 1.698  | 0.000 | 1.633  |
| KRT1      | BC063697     | 0.591 | 1.193  | 0.046 | 2.077  | 0.606 | -1.169 | 0.058 | 1.777  | 0.046 | 2.478  | 0.044 | 2.120  |
| KRT1      | NM_006121    | 0.843 | 1.038  | 0.020 | 1.835  | 0.061 | -1.570 | 0.267 | 1.169  | 0.047 | 1.905  | 0.328 | 1.214  |
| LOC653361 | XM_928908    | 0.961 | -1.009 | 0.036 | 1.499  | 0.141 | -1.272 | 0.270 | 1.178  | 0.071 | 1.485  | 0.355 | 1.167  |
| LPO       | BC107166     | 0.370 | -1.118 | 0.067 | 1.262  | 0.526 | -1.074 | 0.115 | 1.175  | 0.397 | 1.129  | 0.673 | 1.050  |
| LPO       | NM_006151    | 0.064 | -1.137 | 0.020 | 1.125  | 0.102 | -1.100 | 0.628 | 1.023  | 0.891 | -1.010 | 0.157 | -1.112 |
| MB        | BC018001     | 0.521 | 1.316  | 0.146 | 1.783  | 0.547 | -1.286 | 0.408 | 1.386  | 0.119 | 2.346  | 0.266 | 1.824  |
| MB        | NM_005368    | 0.434 | 1.378  | 0.065 | 2.304  | 0.167 | -1.775 | 0.391 | 1.298  | 0.066 | 3.175  | 0.191 | 1.789  |
| MB        | NM_203377    | 0.228 | 1.384  | 0.089 | 1.968  | 0.136 | -1.774 | 0.613 | 1.109  | 0.070 | 2.723  | 0.147 | 1.535  |
| MB        | NM_203378    | 0.425 | 1.284  | 0.105 | 2.023  | 0.140 | -1.852 | 0.689 | 1.092  | 0.103 | 2.598  | 0.288 | 1.402  |



|       |           |       |        |       |        |       |        |       |        |       |        |       |        |
|-------|-----------|-------|--------|-------|--------|-------|--------|-------|--------|-------|--------|-------|--------|
| MBL2  | BC069338  | 0.259 | 1.118  | 0.906 | 1.011  | 0.178 | 1.230  | 0.134 | 1.244  | 0.069 | 1.130  | 0.050 | 1.390  |
| MBL2  | NM_000242 | 0.762 | 1.015  | 0.501 | 1.031  | 0.144 | 1.238  | 0.065 | 1.276  | 0.230 | 1.046  | 0.090 | 1.295  |
| MGST3 | CR607567  | 0.673 | 1.035  | 0.349 | -1.061 | 0.977 | 1.002  | 0.394 | -1.058 | 0.792 | -1.025 | 0.808 | -1.022 |
| MGST3 | NM_004528 | 0.311 | 1.100  | 0.796 | -1.022 | 0.696 | 1.038  | 0.861 | 1.016  | 0.427 | 1.077  | 0.295 | 1.118  |
| MPO   | NM_000250 | 0.347 | -1.068 | 0.019 | 1.148  | 0.020 | -1.117 | 0.595 | 1.027  | 0.265 | 1.075  | 0.527 | -1.039 |
| MPO   | X04876    | 0.251 | 1.228  | 0.820 | 1.035  | 0.407 | 1.156  | 0.331 | 1.196  | 0.052 | 1.271  | 0.068 | 1.469  |
| MPV17 | NM_002437 | 0.025 | -1.261 | 0.078 | -1.250 | 0.590 | 1.041  | 0.066 | -1.200 | 0.000 | -1.576 | 0.000 | -1.514 |
| MSRA  | AY958431  | 0.550 | -1.085 | 0.701 | 1.071  | 0.138 | -1.309 | 0.196 | -1.222 | 0.935 | -1.013 | 0.030 | -1.325 |
| MSRA  | BC054033  | 0.492 | -1.097 | 0.653 | 1.077  | 0.186 | -1.243 | 0.352 | -1.155 | 0.889 | -1.019 | 0.072 | -1.267 |
| MSRA  | NM_012331 | 0.480 | -1.094 | 0.492 | 1.113  | 0.198 | -1.240 | 0.496 | -1.114 | 0.888 | 1.017  | 0.148 | -1.219 |
| MT3   | BC013081  | 0.855 | 1.030  | 0.435 | 1.157  | 0.452 | -1.115 | 0.776 | 1.038  | 0.337 | 1.192  | 0.518 | 1.069  |
| MT3   | NM_005954 | 0.996 | -1.001 | 0.165 | 1.127  | 0.182 | 1.112  | 0.015 | 1.254  | 0.199 | 1.127  | 0.027 | 1.253  |
| NCF1  | NM_000265 | 0.868 | -1.028 | 0.010 | 1.427  | 0.034 | -1.265 | 0.172 | 1.129  | 0.084 | 1.389  | 0.518 | 1.098  |
| NCF2  | BC001606  | 0.233 | -1.201 | 0.250 | -1.265 | 0.527 | 1.179  | 0.692 | -1.073 | 0.088 | -1.519 | 0.218 | -1.289 |
| NCF2  | NM_000433 | 0.228 | -1.208 | 0.352 | -1.231 | 0.587 | 1.172  | 0.792 | -1.051 | 0.143 | -1.487 | 0.281 | -1.269 |
| NCF4  | NM_000631 | 0.120 | -1.276 | 0.029 | -1.433 | 0.074 | 1.345  | 0.568 | -1.065 | 0.014 | -1.827 | 0.064 | -1.358 |
| NOS2A | NM_000625 | 0.300 | 1.085  | 0.014 | 1.572  | 0.139 | -1.294 | 0.053 | 1.215  | 0.022 | 1.706  | 0.042 | 1.319  |
| NOX4  | AJ704727  | 0.279 | 1.122  | 0.708 | 1.033  | 0.973 | 1.002  | 0.693 | 1.035  | 0.033 | 1.159  | 0.074 | 1.161  |
| NOX4  | BC040105  | 0.332 | 1.075  | 0.416 | 1.071  | 0.747 | -1.028 | 0.529 | 1.043  | 0.162 | 1.152  | 0.142 | 1.121  |
| NOX4  | BC051371  | 0.504 | 1.094  | 0.356 | -1.132 | 0.864 | 1.038  | 0.659 | -1.090 | 0.752 | -1.035 | 0.989 | 1.003  |
| NOX4  | NM_016931 | 0.436 | 1.032  | 0.058 | 1.108  | 0.446 | -1.042 | 0.155 | 1.064  | 0.029 | 1.143  | 0.053 | 1.098  |
| NOX5  | AK074071  | 0.735 | 1.096  | 0.150 | 1.528  | 0.341 | -1.317 | 0.553 | 1.160  | 0.139 | 1.676  | 0.409 | 1.272  |
| NOX5  | NM_024505 | 0.969 | 1.009  | 0.067 | 1.794  | 0.164 | -1.489 | 0.384 | 1.205  | 0.093 | 1.811  | 0.366 | 1.216  |
| NQO1  | BC007659  | 0.823 | 1.019  | 0.274 | -1.125 | 0.941 | 1.010  | 0.216 | -1.113 | 0.509 | -1.104 | 0.468 | -1.093 |
| NQO1  | NM_000903 | 0.636 | 1.128  | 0.123 | -1.532 | 0.904 | 1.035  | 0.116 | -1.480 | 0.337 | -1.358 | 0.347 | -1.312 |
| NUDT1 | BC014618  | 0.281 | -1.093 | 0.699 | -1.027 | 0.792 | 1.023  | 0.961 | -1.004 | 0.087 | -1.123 | 0.326 | -1.098 |
| NUDT1 | BC065367  | 0.239 | -1.128 | 0.932 | -1.007 | 0.912 | -1.011 | 0.864 | -1.018 | 0.159 | -1.136 | 0.219 | -1.148 |
| NUDT1 | NM_002452 | 0.128 | -1.219 | 0.921 | 1.010  | 0.767 | -1.033 | 0.840 | -1.023 | 0.141 | -1.207 | 0.116 | -1.247 |
| NUDT1 | NM_198948 | 0.147 | -1.131 | 0.958 | -1.004 | 0.990 | -1.001 | 0.959 | -1.005 | 0.058 | -1.135 | 0.183 | -1.136 |
| NUDT1 | NM_198949 | 0.257 | -1.122 | 0.857 | 1.015  | 0.492 | -1.068 | 0.636 | -1.052 | 0.214 | -1.105 | 0.143 | -1.180 |

|        |           |       |        |       |        |       |        |       |        |       |        |       |        |
|--------|-----------|-------|--------|-------|--------|-------|--------|-------|--------|-------|--------|-------|--------|
| NUDT1  | NM_198953 | 0.237 | -1.138 | 0.715 | 1.032  | 0.817 | -1.020 | 0.907 | 1.012  | 0.235 | -1.102 | 0.275 | -1.124 |
| OXR1   | AB075503  | 0.032 | -1.855 | 0.800 | 1.024  | 0.177 | -1.089 | 0.460 | -1.063 | 0.067 | -1.811 | 0.021 | -1.971 |
| OXR1   | AF309387  | 0.889 | 1.014  | 0.231 | -1.143 | 0.501 | 1.067  | 0.467 | -1.072 | 0.211 | -1.128 | 0.508 | -1.057 |
| OXR1   | AK096148  | 0.418 | -1.019 | 0.093 | 1.033  | 0.955 | 1.001  | 0.097 | 1.034  | 0.581 | 1.013  | 0.556 | 1.014  |
| OXR1   | BC032710  | 0.096 | -1.228 | 0.820 | -1.015 | 0.429 | -1.032 | 0.436 | -1.048 | 0.098 | -1.247 | 0.034 | -1.287 |
| OXR1   | NM_181354 | 0.214 | -1.027 | 0.997 | 1.000  | 0.398 | -1.015 | 0.394 | -1.015 | 0.234 | -1.027 | 0.048 | -1.042 |
| OXSR1  | BC008726  | 0.193 | -1.090 | 0.700 | -1.030 | 0.973 | 1.004  | 0.785 | -1.026 | 0.222 | -1.122 | 0.309 | -1.118 |
| OXSR1  | NM_005109 | 0.136 | -1.087 | 0.103 | -1.131 | 0.735 | 1.033  | 0.169 | -1.095 | 0.036 | -1.230 | 0.040 | -1.191 |
| PDLIM1 | NM_020992 | 0.374 | 1.304  | 0.257 | 1.339  | 0.589 | -1.144 | 0.535 | 1.170  | 0.071 | 1.746  | 0.167 | 1.526  |
| PNKP   | NM_007254 | 0.477 | -1.132 | 0.579 | -1.111 | 0.792 | 1.069  | 0.861 | -1.038 | 0.256 | -1.257 | 0.487 | -1.176 |
| PRDX1  | NM_002574 | 0.167 | 1.058  | 0.074 | -1.085 | 0.252 | 1.049  | 0.309 | -1.035 | 0.589 | -1.026 | 0.553 | 1.022  |
| PRDX1  | NM_181697 | 0.948 | 1.002  | 0.875 | -1.005 | 0.770 | -1.011 | 0.606 | -1.017 | 0.949 | -1.003 | 0.733 | -1.014 |
| PRDX2  | BC003022  | 0.013 | 1.107  | 0.650 | -1.017 | 0.255 | -1.046 | 0.026 | -1.064 | 0.120 | 1.089  | 0.292 | 1.041  |
| PRDX2  | BC064138  | 0.136 | 1.134  | 0.112 | 1.079  | 0.129 | -1.058 | 0.646 | 1.020  | 0.029 | 1.223  | 0.066 | 1.156  |
| PRDX2  | NM_005809 | 0.007 | 1.144  | 0.167 | -1.074 | 0.558 | 1.028  | 0.228 | -1.045 | 0.280 | 1.065  | 0.032 | 1.095  |
| PRDX2  | NM_181738 | 0.006 | 1.231  | 0.286 | -1.077 | 0.717 | -1.020 | 0.092 | -1.100 | 0.068 | 1.142  | 0.031 | 1.119  |
| PRDX3  | NM_006793 | 0.616 | -1.048 | 0.842 | -1.017 | 0.480 | -1.061 | 0.291 | -1.079 | 0.567 | -1.065 | 0.204 | -1.130 |
| PRDX3  | NM_014098 | 0.241 | -1.079 | 0.879 | -1.012 | 0.367 | -1.078 | 0.144 | -1.091 | 0.338 | -1.092 | 0.027 | -1.178 |
| PRDX4  | BC003609  | 0.571 | 1.028  | 0.772 | 1.020  | 0.510 | -1.051 | 0.561 | -1.030 | 0.547 | 1.049  | 0.975 | -1.002 |
| PRDX4  | BC007107  | 0.574 | 1.031  | 0.515 | 1.055  | 0.217 | -1.112 | 0.253 | -1.054 | 0.401 | 1.088  | 0.697 | -1.022 |
| PRDX4  | BC016770  | 0.728 | 1.019  | 0.397 | 1.075  | 0.384 | -1.082 | 0.897 | -1.007 | 0.380 | 1.096  | 0.843 | 1.012  |
| PRDX4  | NM_006406 | 0.407 | 1.043  | 0.624 | 1.044  | 0.581 | -1.052 | 0.881 | -1.008 | 0.406 | 1.088  | 0.560 | 1.034  |
| PRDX5  | NM_012094 | 0.002 | 1.174  | 0.166 | -1.086 | 0.221 | 1.077  | 0.781 | -1.008 | 0.332 | 1.080  | 0.004 | 1.164  |
| PRDX5  | NM_181651 | 0.023 | 1.114  | 0.555 | -1.037 | 0.511 | 1.037  | 0.995 | 1.000  | 0.301 | 1.074  | 0.005 | 1.114  |
| PRDX6  | NM_004905 | 0.738 | 1.036  | 0.386 | -1.118 | 0.429 | 1.093  | 0.784 | -1.023 | 0.583 | -1.080 | 0.888 | 1.012  |
| PREX1  | NM_020820 | 0.114 | -1.148 | 0.215 | -1.137 | 0.650 | 1.056  | 0.346 | -1.077 | 0.056 | -1.305 | 0.049 | -1.237 |
| PRNP   | NM_000311 | 0.462 | -1.113 | 0.397 | 1.200  | 0.387 | -1.258 | 0.820 | -1.048 | 0.731 | 1.078  | 0.470 | -1.167 |
| PTGS1  | BC029840  | 0.004 | 1.315  | 0.001 | -1.560 | 0.046 | 1.275  | 0.002 | -1.224 | 0.280 | -1.186 | 0.391 | 1.075  |
| PTGS1  | DQ180741  | 0.008 | 1.312  | 0.002 | -1.636 | 0.029 | 1.356  | 0.011 | -1.206 | 0.201 | -1.247 | 0.304 | 1.088  |
| PTGS1  | NM_000962 | 0.000 | 1.350  | 0.052 | -1.137 | 0.224 | 1.065  | 0.216 | -1.068 | 0.013 | 1.187  | 0.000 | 1.264  |

|        |              |       |        |       |        |       |        |       |        |       |        |       |        |
|--------|--------------|-------|--------|-------|--------|-------|--------|-------|--------|-------|--------|-------|--------|
| PTGS2  | AJ634912     | 0.210 | -1.167 | 0.008 | 1.414  | 0.069 | -1.253 | 0.171 | 1.129  | 0.215 | 1.212  | 0.790 | -1.034 |
| PTGS2  | AY151286     | 0.057 | -1.059 | 0.103 | 1.024  | 0.144 | -1.022 | 0.894 | 1.002  | 0.301 | -1.034 | 0.066 | -1.057 |
| PTGS2  | BC013734     | 0.127 | -1.054 | 0.442 | 1.015  | 0.583 | -1.013 | 0.917 | 1.002  | 0.321 | -1.039 | 0.166 | -1.052 |
| PTGS2  | NM_000963    | 0.075 | -1.062 | 0.008 | 1.088  | 0.225 | -1.038 | 0.030 | 1.048  | 0.580 | 1.024  | 0.690 | -1.014 |
| PXDN   | XM_056455    | 0.891 | 1.018  | 0.006 | 1.655  | 0.019 | -1.495 | 0.431 | 1.107  | 0.010 | 1.684  | 0.363 | 1.127  |
| PXDN   | XM_935180    | 0.576 | 1.202  | 0.023 | 2.042  | 0.130 | -1.488 | 0.150 | 1.372  | 0.033 | 2.454  | 0.107 | 1.649  |
| PXDN   | XM_935181    | 0.830 | 1.003  | 0.097 | 1.027  | 0.026 | -1.043 | 0.200 | -1.016 | 0.167 | 1.030  | 0.445 | -1.013 |
| PXDN   | XM_935183    | 0.989 | -1.002 | 0.012 | 2.059  | 0.115 | -1.531 | 0.176 | 1.345  | 0.028 | 2.055  | 0.229 | 1.342  |
| RNF7   | AF312226     | 0.715 | -1.035 | 0.039 | 1.217  | 0.023 | -1.246 | 0.689 | -1.024 | 0.199 | 1.175  | 0.538 | -1.060 |
| RNF7   | BC005966     | 0.821 | -1.024 | 0.062 | 1.193  | 0.024 | -1.247 | 0.316 | -1.045 | 0.297 | 1.164  | 0.524 | -1.071 |
| RNF7   | NM_014245    | 0.742 | -1.034 | 0.058 | 1.191  | 0.017 | -1.268 | 0.226 | -1.064 | 0.298 | 1.153  | 0.361 | -1.100 |
| RNF7   | NM_183063    | 0.830 | -1.021 | 0.065 | 1.197  | 0.015 | -1.272 | 0.255 | -1.062 | 0.234 | 1.172  | 0.389 | -1.085 |
| SCARA3 | BC075067     | 0.637 | 1.136  | 0.028 | 2.184  | 0.113 | -1.689 | 0.308 | 1.293  | 0.042 | 2.481  | 0.234 | 1.469  |
| SCARA3 | NM_016240    | 0.394 | 1.200  | 0.135 | 1.353  | 0.730 | 1.089  | 0.101 | 1.474  | 0.083 | 1.624  | 0.070 | 1.769  |
| SCARA3 | NM_182826    | 0.309 | 1.259  | 0.195 | 1.389  | 0.352 | -1.280 | 0.647 | 1.085  | 0.124 | 1.748  | 0.242 | 1.366  |
| SELS   | NM_018445    | 0.941 | 1.009  | 0.427 | 1.080  | 0.062 | -1.196 | 0.063 | -1.107 | 0.587 | 1.089  | 0.435 | -1.098 |
| SELS   | NM_203472    | 0.120 | -1.214 | 0.753 | 1.062  | 0.368 | -1.271 | 0.379 | -1.197 | 0.470 | -1.143 | 0.076 | -1.453 |
| SEPP1  | BC058919     | 0.052 | -1.285 | 0.174 | 1.061  | 0.347 | -1.053 | 0.855 | 1.008  | 0.184 | -1.211 | 0.066 | -1.275 |
| SEPP1  | NM_005410    | 0.127 | -1.245 | 0.707 | 1.027  | 0.779 | -1.018 | 0.892 | 1.009  | 0.220 | -1.213 | 0.132 | -1.234 |
| SFTPD  | NM_003019    | 0.961 | -1.004 | 0.493 | 1.067  | 0.044 | -1.167 | 0.285 | -1.093 | 0.444 | 1.063  | 0.153 | -1.098 |
| SIRT2  | AK131390     | 0.804 | -1.018 | 0.136 | -1.210 | 0.501 | 1.109  | 0.378 | -1.091 | 0.145 | -1.232 | 0.338 | -1.111 |
| SIRT2  | CR617711     | 0.993 | 1.001  | 0.009 | -1.293 | 0.120 | 1.134  | 0.062 | -1.140 | 0.028 | -1.292 | 0.124 | -1.139 |
| SIRT2  | NM_012237    | 0.880 | -1.010 | 0.003 | -1.265 | 0.119 | 1.128  | 0.053 | -1.122 | 0.015 | -1.278 | 0.100 | -1.133 |
| SOD1   | BC001034     | 0.336 | 1.084  | 0.105 | -1.102 | 0.868 | 1.014  | 0.239 | -1.087 | 0.861 | -1.017 | 0.973 | -1.003 |
| SOD1   | NM_000454    | 0.702 | -1.071 | 0.380 | -1.223 | 0.812 | -1.052 | 0.186 | -1.286 | 0.205 | -1.309 | 0.062 | -1.377 |
| SOD2   | BC016934     | 0.103 | 1.227  | 0.927 | 1.018  | 0.906 | 1.023  | 0.688 | 1.041  | 0.375 | 1.249  | 0.063 | 1.277  |
| SOD2   | NM_000636    | 0.356 | 1.222  | 0.032 | -1.946 | 0.428 | 1.314  | 0.082 | -1.480 | 0.188 | -1.593 | 0.455 | -1.212 |
| SOD2   | NM_001024465 | 0.000 | 1.422  | 0.541 | -1.045 | 0.880 | -1.012 | 0.310 | -1.058 | 0.006 | 1.360  | 0.000 | 1.344  |
| SOD3   | BC014418     | 0.113 | 1.618  | 0.075 | 1.558  | 0.333 | -1.254 | 0.342 | 1.242  | 0.011 | 2.521  | 0.031 | 2.010  |
| SOD3   | NM_003102    | 0.614 | 1.084  | 0.048 | 1.510  | 0.344 | -1.208 | 0.134 | 1.251  | 0.064 | 1.637  | 0.119 | 1.355  |

|        |           |       |        |       |        |       |        |       |        |       |        |       |        |
|--------|-----------|-------|--------|-------|--------|-------|--------|-------|--------|-------|--------|-------|--------|
| SQSTM1 | BC001874  | 0.159 | 1.120  | 0.795 | -1.021 | 0.848 | 1.018  | 0.966 | -1.003 | 0.330 | 1.097  | 0.235 | 1.116  |
| SQSTM1 | NM_003900 | 0.388 | 1.110  | 0.002 | -1.503 | 0.081 | 1.296  | 0.123 | -1.160 | 0.112 | -1.354 | 0.761 | -1.045 |
| SRXN1  | NM_080725 | 0.097 | 1.303  | 0.676 | -1.051 | 0.590 | -1.075 | 0.379 | -1.130 | 0.133 | 1.239  | 0.400 | 1.153  |
| STK25  | BC015793  | 0.555 | -1.046 | 0.272 | -1.114 | 0.017 | 1.261  | 0.093 | 1.132  | 0.121 | -1.165 | 0.243 | 1.083  |
| STK25  | NM_006374 | 0.756 | -1.019 | 0.131 | -1.168 | 0.191 | 1.138  | 0.689 | -1.027 | 0.082 | -1.190 | 0.411 | -1.046 |
| TPO    | NM_000547 | 0.261 | 1.273  | 0.097 | 1.764  | 0.365 | -1.342 | 0.204 | 1.315  | 0.081 | 2.245  | 0.087 | 1.673  |
| TPO    | NM_175719 | 0.138 | 1.324  | 0.041 | 1.602  | 0.400 | -1.215 | 0.152 | 1.319  | 0.020 | 2.122  | 0.040 | 1.747  |
| TPO    | NM_175720 | 0.037 | 1.153  | 0.017 | 1.498  | 0.058 | -1.399 | 0.455 | 1.071  | 0.014 | 1.728  | 0.089 | 1.235  |
| TTN    | BC013396  | 0.231 | 1.539  | 0.045 | 1.822  | 0.491 | -1.187 | 0.096 | 1.535  | 0.015 | 2.804  | 0.018 | 2.362  |
| TTN    | NM_003319 | 0.474 | -1.079 | 0.534 | -1.046 | 0.497 | -1.046 | 0.243 | -1.094 | 0.276 | -1.128 | 0.132 | -1.180 |
| TTN    | NM_133379 | 0.494 | 1.101  | 0.050 | 1.769  | 0.197 | -1.440 | 0.263 | 1.229  | 0.061 | 1.947  | 0.175 | 1.353  |
| TXN    | BC003377  | 0.190 | 1.174  | 0.668 | 1.044  | 0.469 | -1.066 | 0.795 | -1.021 | 0.143 | 1.226  | 0.198 | 1.150  |
| TXN    | BX647247  | 0.123 | 1.215  | 0.835 | 1.023  | 0.913 | -1.010 | 0.907 | 1.013  | 0.031 | 1.243  | 0.059 | 1.230  |
| TXN    | NM_003329 | 0.193 | 1.144  | 0.843 | 1.016  | 0.740 | -1.027 | 0.891 | -1.010 | 0.187 | 1.162  | 0.215 | 1.132  |
| TXNRD1 | NM_003330 | 0.640 | -1.097 | 0.806 | 1.050  | 0.848 | -1.051 | 0.996 | -1.001 | 0.865 | -1.044 | 0.716 | -1.098 |
| TXNRD2 | AF201385  | 0.241 | -1.248 | 0.094 | -1.466 | 0.241 | 1.140  | 0.169 | -1.286 | 0.002 | -1.829 | 0.003 | -1.605 |
| TXNRD2 | BX957216  | 0.731 | -1.062 | 0.023 | -1.758 | 0.338 | 1.255  | 0.083 | -1.401 | 0.014 | -1.867 | 0.046 | -1.488 |
| TXNRD2 | NM_006440 | 0.286 | -1.096 | 0.012 | -1.446 | 0.261 | 1.224  | 0.079 | -1.181 | 0.020 | -1.584 | 0.053 | -1.295 |
| UCP2   | NM_003355 | 0.449 | 1.031  | 0.017 | -1.137 | 0.489 | 1.035  | 0.036 | -1.099 | 0.061 | -1.103 | 0.148 | -1.065 |

**Supplementary Table 4.** Expression fold changes of 86 genes represented by 106 transcript clusters belonging to oxidative stress related pathways analyzed in Jurkat T cells exposed to different gravitational conditions during the suborbital ballistic rocket experiment TEXUS-51. Analysis was made with the Affymetrix GeneChip® Human Transcriptome Array.

| gene symbol | transcript cluster ID | H/W 1g GC vs CC |         | BL-TX hyp-g vs H/W 1g GC |         | BL-TX hyp-g vs 1g IF |         | µg vs 1g IF |         | 1g IF vs H/W 1g GC |         | µg vs BL-TX hyp-g |         |
|-------------|-----------------------|-----------------|---------|--------------------------|---------|----------------------|---------|-------------|---------|--------------------|---------|-------------------|---------|
|             |                       | FC              | p-value | FC                       | p-value | FC                   | p-value | FC          | p-value | FC                 | p-value | FC                | p-value |
| ALB         | TC04000403.hg.1       | 1.130           | 0.000   | -1.010                   | 0.010   | -1.080               | 0.000   | -1.070      | 0.001   | 1.070              | 0.014   | 1.000             | 0.250   |
| ALOX12      | TC17000081.hg.1       | 1.230           | 0.000   | -1.100                   | 0.007   | -1.150               | 0.000   | -1.140      | 0.000   | 1.040              | 0.921   | 1.010             | 0.920   |
| AOX1        | TC02001162.hg.1       | 1.130           | 0.000   | -1.050                   | 0.018   | -1.060               | 0.001   | -1.040      | 0.005   | 1.000              | 0.958   | 1.020             | 0.477   |
| APOE        | TC19000633.hg.1       | 1.500           | 0.000   | -1.170                   | 0.003   | -1.210               | 0.000   | -1.200      | 0.003   | 1.030              | 0.765   | 1.010             | 0.455   |
| ATOX1       | TC05001957.hg.1       | 1.100           | 0.002   | -1.090                   | 0.005   | -1.090               | 0.001   | -1.100      | 0.000   | -1.000             | 0.550   | -1.010            | 0.501   |
| BNIP3       | TC10001769.hg.1       | -2.630          | 0.000   | 1.150                    | 0.002   | 1.140                | 0.042   | 1.150       | 0.060   | 1.000              | 0.201   | 1.000             | 0.954   |
| CAT         | TC11000327.hg.1       | -1.140          | 0.003   | 1.140                    | 0.030   | 1.310                | 0.000   | 1.280       | 0.001   | -1.150             | 0.032   | -1.030            | 0.776   |
| CCL5        | TC17001378.hg.1       | 1.160           | 0.000   | -1.030                   | 0.027   | -1.070               | 0.067   | -1.080      | 0.049   | 1.040              | 0.979   | -1.000            | 0.783   |
| CCS         | TC11000672.hg.1       | 1.290           | 0.000   | -1.100                   | 0.004   | -1.120               | 0.008   | -1.090      | 0.041   | 1.020              | 0.521   | 1.020             | 0.482   |
| CYBA        | TC16001339.hg.1       | 1.270           | 0.000   | -1.030                   | 0.395   | -1.170               | 0.000   | -1.150      | 0.001   | 1.140              | 0.000   | 1.020             | 0.463   |
| CYBB        | TC0X000171.hg.1       | 1.150           | 0.001   | -1.040                   | 0.530   | -1.040               | 0.044   | -1.040      | 0.005   | 1.000              | 0.350   | 1.000             | 0.671   |
| CYGB        | TC17001902.hg.1       | 1.510           | 0.000   | -1.160                   | 0.013   | -1.170               | 0.000   | -1.180      | 0.000   | 1.010              | 0.754   | -1.010            | 0.924   |
| DHCR24      | TC01002694.hg.1       | 1.010           | 0.624   | -1.040                   | 0.026   | -1.030               | 0.020   | -1.020      | 0.120   | -1.010             | 0.418   | 1.020             | 0.185   |
| DUOX1       | TC15000352.hg.1       | 1.320           | 0.000   | -1.140                   | 0.004   | -1.150               | 0.000   | -1.170      | 0.000   | 1.020              | 0.458   | -1.010            | 0.803   |
| DUOX2       | TC15001305.hg.1       | 1.340           | 0.000   | -1.130                   | 0.012   | -1.130               | 0.000   | -1.130      | 0.000   | 1.000              | 0.510   | 1.000             | 0.505   |
| DUSP1       | TC05002066.hg.1       | -1.100          | 0.007   | -1.060                   | 0.155   | -1.060               | 0.102   | -1.130      | 0.022   | -1.000             | 0.735   | -1.060            | 0.429   |
| EPHX2       | TC08000208.hg.1       | -1.280          | 0.000   | -1.020                   | 0.428   | 1.060                | 0.115   | 1.100       | 0.000   | -1.080             | 0.031   | 1.050             | 0.048   |
| EPX         | TC17000711.hg.1       | 1.440           | 0.000   | -1.250                   | 0.007   | -1.230               | 0.000   | -1.260      | 0.000   | -1.010             | 0.735   | -1.020            | 0.504   |
| FOXMI       | TC12001106.hg.1       | -1.120          | 0.023   | 1.120                    | 0.197   | -1.080               | 0.015   | -1.040      | 0.161   | 1.210              | 0.001   | 1.040             | 0.042   |

|                   |                         |        |       |        |       |        |       |        |       |        |       |        |       |
|-------------------|-------------------------|--------|-------|--------|-------|--------|-------|--------|-------|--------|-------|--------|-------|
| FTH1              | TC11001860.hg.1         | -1.620 | 0.000 | 1.150  | 0.032 | 1.060  | 0.234 | 1.010  | 0.426 | 1.080  | 0.282 | -1.050 | 0.497 |
| GCLC              | TC06004051.hg.1         | -1.320 | 0.000 | 1.230  | 0.000 | 1.170  | 0.001 | 1.110  | 0.027 | 1.050  | 0.141 | -1.050 | 0.498 |
| GCLM              | TC01002882.hg.1         | -1.530 | 0.000 | 1.340  | 0.000 | 1.240  | 0.003 | 1.210  | 0.025 | 1.080  | 0.273 | -1.020 | 0.668 |
| GPX1              | TC03001407.hg.1         | 1.490  | 0.000 | 1.030  | 0.398 | -1.080 | 0.007 | -1.080 | 0.000 | 1.110  | 0.000 | -1.000 | 0.692 |
| GPX2              | TC14001223.hg.1         | 1.200  | 0.000 | -1.080 | 0.003 | -1.070 | 0.001 | -1.010 | 0.971 | -1.000 | 0.175 | 1.060  | 0.138 |
| GPX3              | TC05000837.hg.1         | 1.380  | 0.000 | -1.120 | 0.009 | -1.100 | 0.001 | -1.100 | 0.003 | -1.020 | 0.744 | -1.000 | 0.697 |
| GPX4              | TC19000030.hg.1         | 1.040  | 0.179 | 1.060  | 0.656 | -1.070 | 0.031 | -1.080 | 0.045 | 1.130  | 0.002 | -1.010 | 0.425 |
| GPX5              | TC06000286.hg.1         | 1.240  | 0.000 | -1.090 | 0.067 | -1.030 | 0.175 | -1.040 | 0.406 | -1.060 | 0.609 | -1.010 | 0.528 |
| GPX5              | TC6_cox_hap2000001.hg.1 | 1.260  | 0.004 | -1.140 | 0.082 | -1.060 | 0.204 | -1.030 | 0.868 | -1.080 | 0.432 | 1.030  | 0.236 |
| GPX6              | TC06001444.hg.1         | 1.130  | 0.011 | -1.020 | 0.470 | -1.100 | 0.010 | -1.110 | 0.002 | 1.080  | 0.181 | -1.000 | 0.887 |
| GPX6              | TC6_cox_hap2000110.hg.1 | 1.170  | 0.106 | -1.220 | 0.292 | -1.190 | 0.119 | -1.130 | 0.024 | -1.020 | 0.714 | 1.060  | 0.912 |
| GPX7              | TC01000643.hg.1         | 1.280  | 0.000 | -1.140 | 0.003 | -1.160 | 0.004 | -1.200 | 0.000 | 1.020  | 0.513 | -1.040 | 0.243 |
| GSR               | TC08001110.hg.1         | 1.030  | 0.427 | 1.100  | 0.001 | 1.110  | 0.010 | 1.100  | 0.054 | -1.000 | 0.335 | -1.000 | 0.627 |
| GSS               | TC20000789.hg.1         | 1.210  | 0.000 | -1.000 | 0.227 | -1.060 | 0.024 | 1.040  | 0.396 | 1.050  | 0.142 | 1.090  | 0.004 |
| GSTP1             | TC11000694.hg.1         | 1.090  | 0.001 | 1.000  | 0.478 | -1.030 | 0.080 | -1.010 | 0.553 | 1.030  | 0.127 | 1.020  | 0.118 |
| GSTZ1             | TC14000489.hg.1         | 1.420  | 0.000 | -1.070 | 0.128 | -1.130 | 0.002 | -1.060 | 0.047 | 1.050  | 0.004 | 1.060  | 0.085 |
| GTF2I             | TC07000458.hg.1         | -2.770 | 0.000 | 1.580  | 0.000 | 1.260  | 0.009 | 1.210  | 0.073 | 1.250  | 0.004 | -1.050 | 0.578 |
| HMOX1             | TC22000259.hg.1         | 1.230  | 0.000 | -1.120 | 0.009 | -1.180 | 0.000 | -1.240 | 0.000 | 1.060  | 0.557 | -1.050 | 0.086 |
| HSPA1A            | TC06001547.hg.1         | 1.330  | 0.000 | -1.100 | 0.107 | -1.070 | 0.204 | -1.120 | 0.011 | -1.030 | 0.669 | -1.050 | 0.283 |
| HSPA1A            | TC6_apd_hap1000088.hg.1 | 1.300  | 0.000 | -1.020 | 0.224 | -1.000 | 0.527 | -1.090 | 0.018 | -1.020 | 0.438 | -1.090 | 0.137 |
| HSPA1A            | TC6_cox_hap2000174.hg.1 | 1.280  | 0.000 | -1.020 | 0.266 | -1.010 | 0.562 | -1.080 | 0.019 | -1.010 | 0.431 | -1.060 | 0.168 |
| HSPA1A            | TC6_dbb_hap3000163.hg.1 | 1.280  | 0.000 | -1.060 | 0.243 | -1.040 | 0.433 | -1.100 | 0.014 | -1.020 | 0.636 | -1.060 | 0.146 |
| HSPA1A            | TC6_qbl_hap6000164.hg.1 | 1.320  | 0.000 | -1.050 | 0.184 | -1.060 | 0.338 | -1.090 | 0.013 | 1.010  | 0.541 | -1.030 | 0.225 |
| HSPA1A;<br>HSPA1B | TC06000384.hg.1         | -1.070 | 0.144 | -1.050 | 0.378 | 1.060  | 0.954 | -1.040 | 0.231 | -1.110 | 0.187 | -1.100 | 0.346 |
| HSPA1A;<br>HSPA1B | TC6_apd_hap1000039.hg.1 | 1.020  | 0.824 | -1.060 | 0.366 | 1.020  | 0.957 | -1.070 | 0.192 | -1.080 | 0.241 | -1.090 | 0.329 |
| HSPA1A;<br>HSPA1B | TC6_cox_hap2000078.hg.1 | 1.020  | 0.891 | -1.060 | 0.375 | 1.040  | 0.985 | -1.040 | 0.274 | -1.100 | 0.232 | -1.080 | 0.377 |
| HSPA1A;<br>HSPA1B | TC6_dbb_hap3000069.hg.1 | 1.030  | 0.753 | -1.070 | 0.338 | 1.040  | 0.971 | -1.050 | 0.211 | -1.110 | 0.181 | -1.090 | 0.313 |

|                            |                         |        |       |        |       |        |       |        |       |        |       |        |       |
|----------------------------|-------------------------|--------|-------|--------|-------|--------|-------|--------|-------|--------|-------|--------|-------|
| HSPA1A;<br>HSPA1B          | TC6_qbl_hap6000069.hg.1 | 1.010  | 0.985 | -1.070 | 0.343 | 1.030  | 0.969 | -1.050 | 0.249 | -1.110 | 0.216 | -1.080 | 0.384 |
| HSPA1B;<br>HSPA1A          | TC06000385.hg.1         | -1.170 | 0.014 | -1.050 | 0.601 | 1.080  | 0.829 | -1.010 | 0.360 | -1.130 | 0.354 | -1.090 | 0.359 |
| HSPA1B;<br>HSPA1A          | TC6_apd_hap1000040.hg.1 | -1.290 | 0.003 | -1.020 | 0.816 | 1.150  | 0.607 | 1.060  | 0.724 | -1.170 | 0.409 | -1.090 | 0.403 |
| HSPA1B;<br>HSPA1A          | TC6_cox_hap2000079.hg.1 | -1.340 | 0.002 | 1.000  | 0.937 | 1.160  | 0.563 | 1.070  | 0.810 | -1.160 | 0.476 | -1.090 | 0.414 |
| HSPA1B;<br>HSPA1A          | TC6_dbb_hap3000070.hg.1 | -1.330 | 0.002 | -1.010 | 0.844 | 1.160  | 0.585 | 1.070  | 0.786 | -1.170 | 0.412 | -1.090 | 0.422 |
| HSPA1B;<br>HSPA1A          | TC6_qbl_hap6000070.hg.1 | -1.210 | 0.016 | 1.010  | 0.919 | 1.150  | 0.616 | 1.050  | 0.616 | -1.140 | 0.501 | -1.100 | 0.343 |
| KRT1                       | TC12001532.hg.1         | 1.090  | 0.027 | -1.010 | 0.385 | 1.000  | 0.785 | -1.000 | 0.571 | -1.020 | 0.703 | -1.010 | 0.589 |
| LOC100129<br>518; SOD2     | TC06004142.hg.1         | -1.190 | 0.010 | -1.010 | 0.371 | -1.140 | 0.010 | -1.210 | 0.011 | 1.120  | 0.078 | -1.060 | 0.504 |
| LPO                        | TC17000712.hg.1         | 1.240  | 0.000 | -1.130 | 0.012 | -1.150 | 0.000 | -1.140 | 0.000 | 1.030  | 0.977 | 1.010  | 0.796 |
| MB                         | TC22000697.hg.1         | 1.390  | 0.000 | -1.150 | 0.005 | -1.130 | 0.000 | -1.130 | 0.006 | -1.010 | 0.898 | 1.000  | 0.402 |
| MB;<br>LOC284912           | TC22000698.hg.1         | 1.280  | 0.001 | -1.170 | 0.011 | -1.120 | 0.075 | -1.090 | 0.142 | -1.050 | 0.460 | 1.030  | 0.520 |
| MBL2                       | TC10001301.hg.1         | 1.090  | 0.013 | -1.030 | 0.390 | -1.070 | 0.040 | -1.060 | 0.032 | 1.040  | 0.251 | 1.010  | 0.665 |
| MGST3                      | TC01001444.hg.1         | -1.200 | 0.000 | -1.020 | 0.713 | 1.030  | 0.387 | -1.010 | 0.844 | -1.050 | 0.736 | -1.050 | 0.331 |
| MGST3;<br>LOC100505<br>828 | TC01001443.hg.1         | 1.130  | 0.001 | 1.030  | 0.263 | 1.040  | 0.087 | 1.100  | 0.004 | -1.000 | 0.516 | 1.060  | 0.068 |
| MPO                        | TC17001727.hg.1         | 1.360  | 0.000 | -1.100 | 0.040 | -1.160 | 0.002 | -1.160 | 0.001 | 1.050  | 0.589 | -1.000 | 0.319 |
| MPV17                      | TC02001681.hg.1         | 1.010  | 0.544 | -1.030 | 0.121 | -1.030 | 0.018 | -1.010 | 0.125 | -1.010 | 0.255 | 1.020  | 0.295 |
| MSRA                       | TC08000071.hg.1         | 1.400  | 0.000 | -1.140 | 0.006 | -1.090 | 0.057 | -1.090 | 0.041 | -1.050 | 0.581 | -1.000 | 0.706 |
| MSRA                       | TC08000073.hg.1         | 1.350  | 0.000 | -1.250 | 0.004 | -1.110 | 0.032 | -1.080 | 0.020 | -1.130 | 0.035 | 1.020  | 0.594 |
| MT3                        | TC16000465.hg.1         | 1.350  | 0.000 | -1.090 | 0.027 | -1.100 | 0.000 | -1.130 | 0.000 | 1.000  | 0.983 | -1.030 | 0.531 |
| NCF1                       | TC07000459.hg.1         | 1.310  | 0.000 | -1.150 | 0.001 | -1.100 | 0.000 | -1.150 | 0.000 | -1.040 | 0.376 | -1.040 | 0.247 |
| NCF2                       | TC01003616.hg.1         | 1.200  | 0.000 | -1.070 | 0.010 | -1.090 | 0.001 | -1.080 | 0.003 | 1.020  | 0.457 | 1.010  | 0.413 |

|                                                |                 |        |       |        |       |        |       |        |       |        |       |        |       |
|------------------------------------------------|-----------------|--------|-------|--------|-------|--------|-------|--------|-------|--------|-------|--------|-------|
| NCF4                                           | TC22000270.hg.1 | 1.370  | 0.000 | -1.160 | 0.001 | -1.120 | 0.002 | -1.110 | 0.004 | -1.040 | 0.294 | 1.010  | 0.804 |
| NOS2                                           | TC17002894.hg.1 | 1.270  | 0.000 | -1.110 | 0.001 | -1.150 | 0.000 | -1.170 | 0.000 | 1.030  | 0.285 | -1.020 | 0.632 |
| NOX4                                           | TC11002178.hg.1 | 1.210  | 0.000 | -1.060 | 0.019 | -1.070 | 0.002 | -1.080 | 0.001 | 1.010  | 0.619 | -1.010 | 0.431 |
| NOX5;<br>SPESP1                                | TC15000630.hg.1 | 1.240  | 0.000 | -1.080 | 0.013 | -1.120 | 0.001 | -1.130 | 0.000 | 1.030  | 0.398 | -1.010 | 0.503 |
| NQO1                                           | TC16001225.hg.1 | 1.150  | 0.001 | 1.000  | 0.814 | -1.070 | 0.077 | -1.030 | 0.848 | 1.070  | 0.047 | 1.040  | 0.076 |
| NUDT1                                          | TC07000029.hg.1 | 1.530  | 0.000 | -1.110 | 0.007 | -1.200 | 0.001 | -1.130 | 0.020 | 1.080  | 0.149 | 1.070  | 0.021 |
| OXR1;<br>RP11-<br>395G23.3                     | TC08000660.hg.1 | -1.060 | 0.001 | 1.010  | 0.448 | 1.020  | 0.340 | -1.010 | 0.817 | -1.000 | 0.735 | -1.020 | 0.371 |
| OXR1                                           | TC03000188.hg.1 | -2.420 | 0.000 | 1.500  | 0.001 | 1.430  | 0.000 | 1.320  | 0.021 | 1.050  | 0.540 | -1.080 | 0.484 |
| PDLIM1                                         | TC10001549.hg.1 | -1.200 | 0.007 | 1.090  | 0.532 | 1.010  | 0.518 | 1.000  | 0.873 | 1.070  | 0.208 | -1.010 | 0.468 |
| PNKP                                           | TC19001727.hg.1 | 1.350  | 0.000 | -1.260 | 0.000 | -1.170 | 0.004 | -1.140 | 0.042 | -1.070 | 0.007 | 1.030  | 0.391 |
| PRDX1                                          | TC01002611.hg.1 | -1.090 | 0.039 | 1.070  | 0.060 | 1.170  | 0.000 | 1.210  | 0.004 | -1.090 | 0.083 | 1.030  | 0.917 |
| PRDX2                                          | TC19001210.hg.1 | -1.000 | 0.889 | 1.010  | 0.388 | -1.020 | 0.151 | -1.020 | 0.401 | 1.030  | 0.385 | 1.000  | 0.317 |
| PRDX3                                          | TC10001702.hg.1 | -1.810 | 0.000 | 1.390  | 0.001 | 1.370  | 0.002 | 1.230  | 0.051 | 1.010  | 0.795 | -1.110 | 0.233 |
| PRDX4                                          | TC0X000110.hg.1 | -1.130 | 0.003 | 1.190  | 0.002 | 1.080  | 0.304 | 1.030  | 0.536 | 1.100  | 0.042 | -1.050 | 0.666 |
| PRDX5                                          | TC11000597.hg.1 | 1.420  | 0.000 | 1.080  | 0.048 | 1.050  | 0.452 | 1.090  | 0.037 | 1.030  | 0.151 | 1.030  | 0.222 |
| PRDX6                                          | TC01001510.hg.1 | -1.140 | 0.015 | 1.150  | 0.010 | 1.030  | 0.322 | 1.010  | 0.495 | 1.120  | 0.050 | -1.020 | 0.412 |
| PREX1                                          | TC20000920.hg.1 | 1.170  | 0.000 | -1.010 | 0.180 | -1.040 | 0.005 | -1.010 | 0.406 | 1.040  | 0.198 | 1.030  | 0.053 |
| PRNP                                           | TC20000051.hg.1 | 1.180  | 0.000 | -1.040 | 0.268 | 1.070  | 0.000 | 1.040  | 0.003 | -1.110 | 0.000 | -1.030 | 0.104 |
| PTGS1                                          | TC09000614.hg.1 | 1.280  | 0.000 | -1.080 | 0.013 | -1.110 | 0.001 | -1.110 | 0.001 | 1.030  | 0.635 | -1.000 | 0.976 |
| PTGS2                                          | TC01003638.hg.1 | 1.190  | 0.000 | -1.060 | 0.037 | -1.090 | 0.002 | -1.090 | 0.002 | 1.030  | 0.201 | -1.000 | 0.743 |
| PXDN                                           | TC02001512.hg.1 | 1.000  | 0.476 | 1.010  | 0.567 | 1.030  | 0.321 | 1.040  | 0.030 | -1.010 | 0.683 | 1.010  | 0.312 |
| RNF7                                           | TC03000764.hg.1 | -1.650 | 0.000 | 1.080  | 0.019 | 1.100  | 0.019 | 1.090  | 0.132 | -1.020 | 0.892 | -1.010 | 0.371 |
| SCARA3                                         | TC08000209.hg.1 | 1.300  | 0.000 | -1.140 | 0.004 | -1.150 | 0.000 | -1.130 | 0.002 | 1.000  | 0.972 | 1.010  | 0.681 |
| SCRT2;<br>SRXN1;<br>PS1TP5;<br>RP5-<br>850E9.3 | TC20000544.hg.1 | 1.300  | 0.000 | -1.090 | 0.040 | -1.040 | 0.019 | -1.020 | 0.086 | -1.050 | 0.458 | 1.020  | 0.553 |



|                           |                 |        |       |        |       |        |       |        |       |        |       |        |       |
|---------------------------|-----------------|--------|-------|--------|-------|--------|-------|--------|-------|--------|-------|--------|-------|
| SEPP1                     | TC05001310.hg.1 | 1.110  | 0.001 | -1.060 | 0.031 | -1.060 | 0.013 | -1.020 | 0.183 | 1.000  | 0.484 | 1.040  | 0.229 |
| SFTPD                     | TC10001458.hg.1 | 1.420  | 0.000 | -1.190 | 0.005 | -1.170 | 0.001 | -1.160 | 0.005 | -1.020 | 0.794 | 1.010  | 0.835 |
| SIRT2                     | TC19001508.hg.1 | 1.220  | 0.000 | -1.200 | 0.000 | -1.120 | 0.001 | -1.120 | 0.007 | -1.070 | 0.007 | 1.000  | 0.702 |
| SOD1                      | TC21000111.hg.1 | -1.420 | 0.000 | 1.300  | 0.001 | 1.200  | 0.003 | 1.270  | 0.001 | 1.080  | 0.156 | 1.060  | 0.595 |
| SOD2;<br>LOC100129<br>518 | TC06004141.hg.1 | -1.060 | 0.001 | 1.030  | 0.168 | 1.040  | 0.044 | 1.040  | 0.041 | -1.020 | 0.282 | -1.000 | 0.924 |
| SOD3                      | TC04000173.hg.1 | 1.400  | 0.000 | -1.160 | 0.027 | -1.200 | 0.004 | -1.210 | 0.002 | 1.030  | 0.390 | -1.010 | 0.831 |
| SQSTM1                    | TC05001053.hg.1 | 1.170  | 0.000 | -1.100 | 0.004 | -1.120 | 0.000 | -1.070 | 0.002 | 1.010  | 0.665 | 1.040  | 0.118 |
| STK25                     | TC02002951.hg.1 | 1.230  | 0.000 | -1.030 | 0.047 | -1.110 | 0.000 | -1.100 | 0.000 | 1.080  | 0.000 | 1.010  | 0.257 |
| TPO                       | TC02000013.hg.1 | 1.290  | 0.000 | -1.070 | 0.009 | -1.110 | 0.000 | -1.100 | 0.000 | 1.040  | 0.013 | 1.010  | 0.265 |
| TTN                       | TC02005047.hg.1 | 1.140  | 0.000 | -1.050 | 0.007 | -1.070 | 0.000 | -1.070 | 0.001 | 1.010  | 0.528 | 1.000  | 0.844 |
| TXN                       | TC09001473.hg.1 | -1.670 | 0.000 | 1.370  | 0.000 | 1.290  | 0.000 | 1.250  | 0.004 | 1.060  | 0.156 | -1.030 | 0.595 |
| TXNRD1                    | TC12000810.hg.1 | -1.650 | 0.000 | 1.370  | 0.000 | 1.300  | 0.001 | 1.220  | 0.022 | 1.060  | 0.254 | -1.060 | 0.525 |
| TXNRD2                    | TC22000502.hg.1 | 1.280  | 0.000 | -1.100 | 0.006 | -1.120 | 0.000 | -1.130 | 0.000 | 1.020  | 0.637 | -1.010 | 0.495 |
| UCP2                      | TC11002074.hg.1 | -1.150 | 0.001 | 1.020  | 0.891 | -1.130 | 0.005 | -1.050 | 0.099 | 1.150  | 0.001 | 1.070  | 0.114 |
| VIMP                      | TC15002006.hg.1 | -1.010 | 0.404 | 1.120  | 0.002 | 1.020  | 0.807 | 1.050  | 0.175 | 1.100  | 0.004 | 1.030  | 0.276 |

**Supplementary Table 5.** Expression fold changes of 86 genes represented by 106 transcript clusters belonging to oxidative stress related pathways analyzed in Jurkat T cells exposed to different gravitational conditions during parabolic flight (23<sup>rd</sup> DLR PFC). Analysis was made with the Affymetrix GeneChip® Human Transcriptome Array.

| gene symbol | transcript Cluster ID | 1g IF vs<br>H/W 1g GC |         | BL -PFC hyp-g vs<br>1g IF |         | µg vs<br>1g IF |         | µg vs<br>BL-PFC hyp-g |         |
|-------------|-----------------------|-----------------------|---------|---------------------------|---------|----------------|---------|-----------------------|---------|
|             |                       | FC                    | p-value | FC                        | p-value | FC             | p-value | FC                    | p-value |
| ALB         | TC04000403.hg.1       | 1.070                 | 0.016   | -1.020                    | 0.285   | -1.010         | 0.988   | 1.010                 | 0.383   |
| ALOX12      | TC17000081.hg.1       | 1.130                 | 0.000   | -1.040                    | 0.158   | -1.090         | 0.050   | -1.050                | 0.431   |
| AOX1        | TC02001162.hg.1       | 1.050                 | 0.069   | -1.040                    | 0.197   | -1.020         | 0.039   | 1.020                 | 0.441   |
| APOE        | TC19000633.hg.1       | 1.060                 | 0.024   | -1.060                    | 0.138   | -1.050         | 0.257   | 1.010                 | 0.599   |
| ATOX1       | TC05001957.hg.1       | -1.000                | 0.591   | -1.060                    | 0.015   | -1.010         | 0.216   | 1.050                 | 0.106   |
| BNIP3       | TC10001769.hg.1       | 1.040                 | 0.177   | 1.020                     | 0.140   | 1.000          | 0.297   | -1.010                | 0.467   |
| CAT         | TC11000327.hg.1       | 1.020                 | 0.273   | 1.070                     | 0.014   | 1.030          | 0.287   | -1.040                | 0.144   |
| CCL5        | TC17001378.hg.1       | 1.090                 | 0.003   | 1.000                     | 0.513   | 1.020          | 0.131   | 1.020                 | 0.280   |
| CCS         | TC11000672.hg.1       | -1.010                | 0.167   | -1.020                    | 0.016   | -1.020         | 0.196   | 1.010                 | 0.477   |
| CYBA        | TC16001339.hg.1       | 1.090                 | 0.013   | -1.010                    | 0.787   | -1.000         | 0.930   | 1.010                 | 0.702   |
| CYBB        | TC0X000171.hg.1       | 1.050                 | 0.104   | -1.060                    | 0.200   | -1.130         | 0.082   | -1.060                | 0.324   |
| CYGB        | TC17001902.hg.1       | 1.090                 | 0.007   | -1.010                    | 0.503   | -1.030         | 0.280   | -1.020                | 0.476   |
| DHCR24      | TC01002694.hg.1       | -1.280                | 0.000   | 1.100                     | 0.023   | 1.040          | 0.289   | -1.060                | 0.433   |
| DUOX1       | TC15000352.hg.1       | 1.110                 | 0.003   | -1.060                    | 0.015   | -1.060         | 0.050   | 1.000                 | 0.338   |
| DUOX2       | TC15001305.hg.1       | 1.100                 | 0.005   | -1.070                    | 0.002   | -1.070         | 0.019   | -1.000                | 0.881   |
| DUSP1       | TC05002066.hg.1       | -1.030                | 0.164   | -1.060                    | 0.664   | -1.040         | 0.215   | 1.010                 | 0.436   |
| EPHX2       | TC08000208.hg.1       | -1.550                | 0.000   | -1.140                    | 0.002   | -1.070         | 0.164   | 1.070                 | 0.329   |
| EPX         | TC17000711.hg.1       | 1.100                 | 0.007   | -1.100                    | 0.008   | -1.080         | 0.059   | 1.020                 | 0.403   |
| FOXO1       | TC12001106.hg.1       | -1.120                | 0.043   | 1.140                     | 0.241   | 1.110          | 0.062   | -1.020                | 0.686   |
| FTH1        | TC11001860.hg.1       | -1.060                | 0.025   | 1.010                     | 0.384   | 1.010          | 0.681   | -1.000                | 0.584   |

|                |                         |        |       |        |       |        |       |        |       |
|----------------|-------------------------|--------|-------|--------|-------|--------|-------|--------|-------|
| GCLC           | TC06004051.hg.1         | -1.110 | 0.000 | 1.020  | 0.100 | 1.030  | 0.065 | 1.000  | 0.942 |
| GCLM           | TC01002882.hg.1         | -1.180 | 0.000 | 1.110  | 0.002 | 1.090  | 0.018 | -1.020 | 0.634 |
| GPX1           | TC03001407.hg.1         | -1.110 | 0.024 | 1.020  | 0.357 | 1.030  | 0.745 | 1.010  | 0.544 |
| GPX2           | TC14001223.hg.1         | 1.140  | 0.140 | -1.120 | 0.116 | -1.010 | 0.823 | 1.110  | 0.173 |
| GPX3           | TC05000837.hg.1         | 1.100  | 0.021 | -1.030 | 0.280 | -1.100 | 0.010 | -1.060 | 0.087 |
| GPX4           | TC19000030.hg.1         | 1.040  | 0.138 | -1.030 | 0.770 | -1.040 | 0.173 | -1.010 | 0.273 |
| GPX5           | TC06000286.hg.1         | 1.050  | 0.115 | -1.020 | 0.883 | -1.030 | 0.754 | -1.010 | 0.703 |
| GPX5           | TC6_cox_hap2000001.hg.1 | 1.100  | 0.160 | -1.010 | 0.930 | 1.010  | 0.619 | 1.020  | 0.619 |
| GPX6           | TC06001444.hg.1         | 1.010  | 0.700 | -1.040 | 0.605 | -1.030 | 0.476 | 1.010  | 0.808 |
| GPX6           | TC6_cox_hap2000110.hg.1 | -1.040 | 0.512 | -1.000 | 0.978 | -1.130 | 0.463 | -1.130 | 0.408 |
| GPX7           | TC01000643.hg.1         | 1.000  | 0.330 | -1.020 | 0.372 | 1.030  | 0.976 | 1.050  | 0.507 |
| GSR            | TC08001110.hg.1         | 1.100  | 0.001 | 1.110  | 0.001 | 1.060  | 0.008 | -1.050 | 0.584 |
| GSS            | TC20000789.hg.1         | -1.040 | 0.760 | 1.000  | 0.268 | -1.050 | 0.059 | -1.050 | 0.298 |
| GSTP1          | TC11000694.hg.1         | -1.020 | 0.543 | -1.000 | 0.867 | -1.020 | 0.277 | -1.020 | 0.083 |
| GSTZ1          | TC14000489.hg.1         | -1.070 | 0.033 | -1.000 | 0.931 | -1.010 | 0.644 | -1.010 | 0.548 |
| GTF2I          | TC07000458.hg.1         | -1.140 | 0.003 | 1.030  | 0.837 | 1.050  | 0.611 | 1.020  | 0.508 |
| HMOX1          | TC22000259.hg.1         | 1.120  | 0.003 | -1.090 | 0.017 | -1.090 | 0.047 | -1.000 | 0.865 |
| HSPA1A         | TC06001547.hg.1         | 1.230  | 0.386 | 1.030  | 0.903 | -1.020 | 0.758 | -1.060 | 0.877 |
| HSPA1A         | TC6_apd_hap1000088.hg.1 | 1.160  | 0.465 | 1.030  | 0.722 | -1.020 | 0.585 | -1.050 | 0.930 |
| HSPA1A         | TC6_cox_hap2000174.hg.1 | 1.160  | 0.418 | 1.020  | 0.622 | -1.020 | 0.596 | -1.050 | 0.940 |
| HSPA1A         | TC6_dbb_hap3000163.hg.1 | 1.210  | 0.414 | 1.020  | 0.784 | -1.010 | 0.636 | -1.030 | 0.877 |
| HSPA1A         | TC6_qbl_hap6000164.hg.1 | 1.130  | 0.424 | 1.010  | 0.767 | -1.010 | 0.843 | -1.020 | 0.864 |
| HSPA1A; HSPA1B | TC06000384.hg.1         | 2.860  | 0.040 | -1.010 | 0.993 | -1.120 | 0.682 | -1.110 | 0.549 |
| HSPA1A; HSPA1B | TC6_apd_hap1000039.hg.1 | 2.920  | 0.038 | -1.050 | 0.869 | -1.150 | 0.552 | -1.100 | 0.577 |
| HSPA1A; HSPA1B | TC6_cox_hap2000078.hg.1 | 2.920  | 0.039 | -1.050 | 0.873 | -1.150 | 0.556 | -1.100 | 0.578 |
| HSPA1A; HSPA1B | TC6_dbb_hap3000069.hg.1 | 2.840  | 0.037 | -1.040 | 0.841 | -1.150 | 0.523 | -1.100 | 0.586 |
| HSPA1A; HSPA1B | TC6_qbl_hap6000069.hg.1 | 2.930  | 0.038 | -1.060 | 0.862 | -1.160 | 0.546 | -1.090 | 0.583 |
| HSPA1B; HSPA1A | TC06000385.hg.1         | 3.450  | 0.033 | 1.010  | 0.958 | -1.140 | 0.723 | -1.160 | 0.538 |
| HSPA1B; HSPA1A | TC6_apd_hap1000040.hg.1 | 3.900  | 0.030 | 1.020  | 0.918 | -1.140 | 0.757 | -1.150 | 0.523 |
| HSPA1B; HSPA1A | TC6_cox_hap2000079.hg.1 | 3.700  | 0.031 | 1.020  | 0.908 | -1.140 | 0.757 | -1.160 | 0.511 |

|                     |                         |        |       |        |       |        |       |        |       |
|---------------------|-------------------------|--------|-------|--------|-------|--------|-------|--------|-------|
| HSPA1B; HSPA1A      | TC6_dbb_hap3000070.hg.1 | 3.830  | 0.031 | 1.010  | 0.917 | -1.140 | 0.758 | -1.160 | 0.523 |
| HSPA1B; HSPA1A      | TC6_qbl_hap6000070.hg.1 | 3.690  | 0.029 | 1.020  | 0.922 | -1.130 | 0.756 | -1.150 | 0.528 |
| KRT1                | TC12001532.hg.1         | -1.420 | 0.001 | -1.080 | 0.244 | -1.110 | 0.057 | -1.020 | 0.267 |
| LOC100129518; SOD2  | TC06004142.hg.1         | -1.010 | 0.373 | 1.020  | 0.512 | 1.030  | 0.702 | 1.010  | 0.815 |
| LPO                 | TC17000712.hg.1         | 1.090  | 0.003 | -1.050 | 0.179 | -1.010 | 0.262 | 1.040  | 0.557 |
| MB                  | TC22000697.hg.1         | 1.130  | 0.002 | -1.060 | 0.129 | -1.090 | 0.009 | -1.030 | 0.216 |
| MB; LOC284912       | TC22000698.hg.1         | 1.180  | 0.094 | -1.040 | 0.818 | -1.030 | 0.650 | 1.010  | 0.657 |
| MBL2                | TC10001301.hg.1         | 1.130  | 0.006 | -1.010 | 0.446 | -1.050 | 0.076 | -1.050 | 0.550 |
| MGST3               | TC01001444.hg.1         | 1.100  | 0.028 | 1.010  | 0.913 | 1.030  | 0.273 | 1.020  | 0.183 |
| MGST3; LOC100505828 | TC01001443.hg.1         | 1.040  | 0.418 | -1.030 | 0.388 | -1.050 | 0.199 | -1.020 | 0.482 |
| MPO                 | TC17001727.hg.1         | 1.120  | 0.002 | -1.070 | 0.048 | -1.070 | 0.004 | -1.000 | 0.676 |
| MPV17               | TC02001681.hg.1         | -1.070 | 0.003 | -1.040 | 0.118 | -1.060 | 0.026 | -1.020 | 0.474 |
| MSRA                | TC08000071.hg.1         | 1.090  | 0.005 | -1.040 | 0.200 | -1.060 | 0.062 | -1.020 | 0.477 |
| MSRA                | TC08000073.hg.1         | 1.110  | 0.007 | -1.020 | 0.223 | -1.070 | 0.088 | -1.040 | 0.774 |
| MT3                 | TC16000465.hg.1         | 1.050  | 0.053 | -1.050 | 0.524 | -1.010 | 0.283 | 1.040  | 0.103 |
| NCF1                | TC07000459.hg.1         | 1.060  | 0.009 | -1.040 | 0.032 | -1.050 | 0.064 | -1.010 | 0.682 |
| NCF2                | TC01003616.hg.1         | 1.020  | 0.539 | -1.030 | 0.326 | -1.020 | 0.317 | 1.010  | 0.844 |
| NCF4                | TC22000270.hg.1         | 1.100  | 0.063 | -1.030 | 0.520 | -1.030 | 0.993 | 1.000  | 0.443 |
| NOS2                | TC17002894.hg.1         | 1.100  | 0.006 | -1.030 | 0.206 | -1.040 | 0.199 | -1.010 | 0.983 |
| NOX4                | TC11002178.hg.1         | 1.020  | 0.229 | 1.010  | 0.892 | 1.000  | 0.800 | -1.010 | 0.916 |
| NOX5; SPESP1        | TC15000630.hg.1         | 1.070  | 0.000 | -1.030 | 0.039 | -1.030 | 0.231 | -1.000 | 0.507 |
| NQO1                | TC16001225.hg.1         | -1.140 | 0.042 | 1.140  | 0.027 | 1.040  | 0.870 | -1.100 | 0.249 |
| NUDT1               | TC07000029.hg.1         | 1.030  | 0.420 | -1.030 | 0.601 | -1.000 | 0.961 | 1.030  | 0.531 |
| OXR1; RP11-395G23.3 | TC08000660.hg.1         | 1.030  | 0.026 | 1.060  | 0.020 | 1.050  | 0.061 | -1.000 | 0.933 |
| OXR1                | TC03000188.hg.1         | 1.040  | 0.155 | 1.110  | 0.008 | 1.060  | 0.040 | -1.040 | 0.228 |
| PDLIM1              | TC10001549.hg.1         | -1.020 | 0.210 | 1.020  | 0.247 | 1.000  | 0.486 | -1.020 | 0.518 |
| PNKP                | TC19001727.hg.1         | 1.060  | 0.010 | -1.040 | 0.071 | -1.000 | 0.877 | 1.040  | 0.072 |
| PRDX1               | TC01002611.hg.1         | 1.020  | 0.594 | 1.030  | 0.077 | -1.030 | 0.554 | -1.050 | 0.042 |
| PRDX2               | TC19001210.hg.1         | -1.080 | 0.245 | -1.020 | 0.491 | -1.090 | 0.046 | -1.080 | 0.060 |
| PRDX3               | TC10001702.hg.1         | -1.170 | 0.017 | 1.050  | 0.325 | -1.050 | 0.274 | -1.100 | 0.068 |

|                                   |                 |        |       |        |       |        |       |        |       |
|-----------------------------------|-----------------|--------|-------|--------|-------|--------|-------|--------|-------|
| PRDX4                             | TC0X000110.hg.1 | -1.240 | 0.002 | 1.080  | 0.165 | 1.030  | 0.519 | -1.060 | 0.341 |
| PRDX5                             | TC11000597.hg.1 | 1.010  | 0.846 | -1.020 | 0.896 | -1.050 | 0.752 | -1.030 | 0.792 |
| PRDX6                             | TC01001510.hg.1 | -1.020 | 0.565 | 1.040  | 0.083 | 1.010  | 0.565 | -1.030 | 0.230 |
| PREX1                             | TC20000920.hg.1 | 1.140  | 0.025 | -1.030 | 0.644 | 1.010  | 0.716 | 1.040  | 0.396 |
| PRNP                              | TC20000051.hg.1 | -1.240 | 0.002 | -1.010 | 0.781 | -1.050 | 0.128 | -1.030 | 0.093 |
| PTGS1                             | TC09000614.hg.1 | 1.090  | 0.002 | -1.030 | 0.337 | -1.030 | 0.248 | -1.000 | 0.870 |
| PTGS2                             | TC01003638.hg.1 | 1.070  | 0.010 | -1.000 | 0.914 | 1.000  | 0.441 | 1.010  | 0.596 |
| PXDN                              | TC02001512.hg.1 | 1.040  | 0.117 | -1.020 | 0.212 | -1.010 | 0.274 | 1.000  | 0.626 |
| RNF7                              | TC03000764.hg.1 | -1.130 | 0.033 | 1.080  | 0.128 | -1.010 | 0.690 | -1.090 | 0.074 |
| SCARA3                            | TC08000209.hg.1 | 1.060  | 0.058 | -1.000 | 0.891 | -1.050 | 0.148 | -1.040 | 0.212 |
| SCRT2; SRXN1; PS1TP5; RP5-850E9.3 | TC20000544.hg.1 | 1.030  | 0.132 | -1.040 | 0.101 | -1.050 | 0.322 | -1.010 | 0.508 |
| SEPP1                             | TC05001310.hg.1 | 1.010  | 0.167 | -1.010 | 0.568 | -1.000 | 0.313 | 1.010  | 0.326 |
| SFTPD                             | TC10001458.hg.1 | 1.120  | 0.020 | -1.070 | 0.105 | -1.040 | 0.411 | 1.030  | 0.351 |
| SIRT2                             | TC19001508.hg.1 | 1.010  | 0.266 | -1.040 | 0.031 | -1.040 | 0.019 | -1.000 | 0.784 |
| SOD1                              | TC21000111.hg.1 | -1.030 | 0.419 | 1.130  | 0.019 | 1.050  | 0.172 | -1.080 | 0.143 |
| SOD2; LOC100129518                | TC06004141.hg.1 | 1.020  | 0.362 | 1.070  | 0.012 | 1.030  | 0.274 | -1.040 | 0.250 |
| SOD3                              | TC04000173.hg.1 | -1.010 | 0.984 | -1.020 | 0.509 | 1.030  | 0.610 | 1.060  | 0.297 |
| SQSTM1                            | TC05001053.hg.1 | 1.000  | 0.564 | 1.020  | 0.668 | -1.010 | 0.293 | -1.030 | 0.593 |
| STK25                             | TC02002951.hg.1 | 1.020  | 0.110 | -1.030 | 0.067 | 1.010  | 0.702 | 1.030  | 0.117 |
| TPO                               | TC02000013.hg.1 | -1.050 | 0.019 | -1.040 | 0.014 | -1.060 | 0.003 | -1.020 | 0.719 |
| TTN                               | TC02005047.hg.1 | 1.050  | 0.011 | -1.030 | 0.744 | 1.020  | 0.067 | 1.040  | 0.114 |
| TXN                               | TC09001473.hg.1 | -1.040 | 0.504 | 1.080  | 0.066 | 1.020  | 0.820 | -1.060 | 0.056 |
| TXNRD1                            | TC12000810.hg.1 | -1.030 | 0.665 | 1.100  | 0.036 | 1.020  | 0.432 | -1.080 | 0.154 |
| TXNRD2                            | TC22000502.hg.1 | 1.030  | 0.138 | -1.040 | 0.025 | -1.060 | 0.014 | -1.010 | 0.634 |
| UCP2                              | TC11002074.hg.1 | 1.160  | 0.016 | -1.030 | 0.510 | 1.010  | 0.806 | 1.040  | 0.360 |
| VIMP                              | TC15002006.hg.1 | -1.090 | 0.035 | 1.100  | 0.008 | 1.090  | 0.186 | -1.020 | 0.209 |

**Supplementary Table 6:** List of genes of the four groups of gravity-sensitive transcripts in figure 1 a-d. If genes are represented by more than one transcript in the group, the gene name is listed only once.

| hypergravity-sensitive transcripts |                | hypergravity-sensitive transcripts, 1g IF-controlled |                | microgravity-sensitive transcripts, BL-controlled |                | microgravity-sensitive transcripts, BL and 1g IF-controlled |                |
|------------------------------------|----------------|------------------------------------------------------|----------------|---------------------------------------------------|----------------|-------------------------------------------------------------|----------------|
| up-regulated                       | down-regulated | up-regulated                                         | down-regulated | up-regulated                                      | down-regulated | up-regulated                                                | down-regulated |
| DUOX2                              | CAT            | EPHX2                                                | CYBA           | CYBA                                              | PXDN           | CYBA                                                        | PXDN           |
| EPHX2                              | CYBB           | GPX5                                                 | CYBB           | PTGS1                                             |                |                                                             |                |
| GPX5                               | FOXM1          | GPX6                                                 | FOXM1          |                                                   |                |                                                             |                |
| GPX6                               | GCLC           | GPX7                                                 | GCLM           |                                                   |                |                                                             |                |
| GPX7                               | GSR            | KRT1                                                 | GSR            |                                                   |                |                                                             |                |
| GPX7                               | GSS            | LOC653361                                            | GTF2I          |                                                   |                |                                                             |                |
| HMOX1                              | GSTZ1          | NCF1                                                 | NCF4           |                                                   |                |                                                             |                |
| HSPA1A                             | GTF2I          | NOS2A                                                | SOD2           |                                                   |                |                                                             |                |
| KRT1                               | MPV17          | PTGS2                                                | SQSTM1         |                                                   |                |                                                             |                |
| NOS2A                              | NCF4           | PXDN                                                 | TXNRD2         |                                                   |                |                                                             |                |
| PXDN                               | TXNRD2         | SCARA3                                               |                |                                                   |                |                                                             |                |
| SCARA3                             |                | SOD3                                                 |                |                                                   |                |                                                             |                |
| SOD2                               |                | TPO                                                  |                |                                                   |                |                                                             |                |
| SOD3                               |                | TTN                                                  |                |                                                   |                |                                                             |                |
| TPO                                |                |                                                      |                |                                                   |                |                                                             |                |
| TTN                                |                |                                                      |                |                                                   |                |                                                             |                |

**Supplementary Table 7:** List of genes of the two groups of gravity-sensitive transcripts in figure 2 a and b. If genes are represented by more than one transcript in the group, the gene name is listed only once.

| <b>hyperravity-sensitive transcripts</b> |                | <b>microgravity-sensitive transcripts, BL-controlled</b> |                |
|------------------------------------------|----------------|----------------------------------------------------------|----------------|
| up-regulated                             | down-regulated | up-regulated                                             | down-regulated |
| CAT                                      | ALOX12         | ALOX12                                                   | GCLM           |
| CYBB                                     | GPX5           | GPX7                                                     | GSR            |
| GCLC                                     | KRT1           | LOC653361                                                | MSRA           |
| GCLM                                     | MB             | MT3                                                      | OXS1           |
| GPX4                                     | MT3            | NCF1                                                     | PRDX4          |
| GSR                                      | PNKP           | PXDN                                                     | PRNP           |
| GTF2I                                    |                | SOD3                                                     | PTGS2          |
| HSPA1A                                   |                |                                                          | SELS           |
| MSRA                                     |                |                                                          | SOD1           |
| NQO1                                     |                |                                                          | SOD2           |
| OXR1                                     |                |                                                          |                |
| OXS1                                     |                |                                                          |                |
| PRDX3                                    |                |                                                          |                |
| PRDX4                                    |                |                                                          |                |
| PREX1                                    |                |                                                          |                |
| PRNP                                     |                |                                                          |                |
| PTGS1                                    |                |                                                          |                |
| PTGS2                                    |                |                                                          |                |

|               |  |  |  |
|---------------|--|--|--|
| <b>SELS</b>   |  |  |  |
| <b>SOD1</b>   |  |  |  |
| <b>SOD2</b>   |  |  |  |
| <b>TXNRD1</b> |  |  |  |



**Supplementary Table 8:** Lists of genes in the four reactions categories shown in figure 4. Human myelomonocytic U937 cells were exposed to 20s 1.8g and 75s max. 13.5g of hypergravity, gene regulation of 188 transcripts involved in oxidative stress response were monitored over these 2 time points. If genes are represented by more than one transcript in the group, the gene name is listed only once.

| continuous response | adaption  | late response | no response |
|---------------------|-----------|---------------|-------------|
| PTGS2               | CYBA      | ALOX12        | ALB         |
|                     | CYBB      | CAT           | ALOX12      |
|                     | EPHX2     | GCLC          | AOX1        |
|                     | FOXO1     | GCLM          | APOE        |
|                     | FOXO1     | GPX4          | ATOX1       |
|                     | GCLM      | GTF2I         | BNIP3       |
|                     | GPX5      | MB            | CCL5        |
|                     | GPX6      | MSRA          | CCS         |
|                     | GPX7      | MT3           | CYGB        |
|                     | GSR       | NQO1          | DHCR24      |
|                     | GTF2I     | OXR1          | DUOX1       |
|                     | KRT1      | OXS1          | DUOX2       |
|                     | KRT1      | PNKP          | DUSP1       |
|                     | LOC653361 | PRDX3         | EPX         |
|                     | NCF1      | PRDX4         | FTH1        |
|                     | NCF4      | PREX1         | GPX1        |
|                     | NOS2A     | PRNP          | GPX2        |
|                     | PXDN      | PTGS2         | GPX3        |
|                     | PXDN      | SELS          | GPX4        |
|                     | SCARA3    | SOD1          | GPX5        |

|  |        |        |        |
|--|--------|--------|--------|
|  | SOD2   | TXNRD1 | GPX7   |
|  | SOD3   |        | GSS    |
|  | SQSTM1 |        | GSTP1  |
|  | TPO    |        | HMOX1  |
|  | TTN    |        | LPO    |
|  | TXNRD2 |        | MB     |
|  |        |        | MBL2   |
|  |        |        | MGST3  |
|  |        |        | MPO    |
|  |        |        | MPV17  |
|  |        |        | MT3    |
|  |        |        | NCF2   |
|  |        |        | NOX4   |
|  |        |        | NOX5   |
|  |        |        | NQO1   |
|  |        |        | NUDT1  |
|  |        |        | OXR1   |
|  |        |        | PDLIM1 |
|  |        |        | PRDX1  |
|  |        |        | PRDX2  |
|  |        |        | PRDX5  |
|  |        |        | PRDX6  |
|  |        |        | PTGS2  |
|  |        |        | PXDN   |
|  |        |        | RNF7   |
|  |        |        | SCARA3 |
|  |        |        | SELS   |
|  |        |        | SEPP1  |
|  |        |        | SFTPD  |
|  |        |        | SIRT2  |

|  |  |  |        |
|--|--|--|--------|
|  |  |  | SOD1   |
|  |  |  | SOD2   |
|  |  |  | SOD3   |
|  |  |  | SQSTM1 |
|  |  |  | SRXN1  |
|  |  |  | STK25  |
|  |  |  | TPO    |
|  |  |  | TTN    |
|  |  |  | TXN    |
|  |  |  | TXNRD2 |
|  |  |  | UCP2   |

**Supplementary Table 9:** Lists of genes in the four reactions categories shown in figure 5. Human myelomonocytic U937 cells were exposed to 20 s and 300s of microgravity, gene regulation of 188 transcripts involved in oxidative stress response were monitored over these 2 time points. If genes are represented by more than one transcript in the group, the gene name is listed only once.

| <b>continuous response</b> | <b>adaption</b> | <b>late response</b> | <b>no response</b> |
|----------------------------|-----------------|----------------------|--------------------|
|                            | CYBA            | ALOX12               | ALB                |
|                            | PXDN            | GCLM                 | ALOX12             |
|                            |                 | GPX7                 | AOX1               |
|                            |                 | GSR                  | APOE               |
|                            |                 | LOC653361            | ATOX1              |
|                            |                 | MSRA                 | BNIP3              |
|                            |                 | MT3                  | CAT                |
|                            |                 | NCF1                 | CCL5               |
|                            |                 | OXSRI                | CCS                |
|                            |                 | PRDX4                | CYBA               |
|                            |                 | PRNP                 | CYBB               |
|                            |                 | PTGS2                | DHCR24             |
|                            |                 | PXDN                 | DUOX1              |
|                            |                 | SELS                 | DUOX2              |
|                            |                 | SOD1                 | DUSP1              |
|                            |                 | SOD3                 | EPHX2              |
|                            |                 |                      | EPX                |
|                            |                 |                      | FOXM1              |
|                            |                 |                      | FTH1               |
|                            |                 |                      | GCLC               |

|  |  |  |        |
|--|--|--|--------|
|  |  |  | GCLM   |
|  |  |  | GPX1   |
|  |  |  | GPX2   |
|  |  |  | GPX3   |
|  |  |  | GPX4   |
|  |  |  | GPX5   |
|  |  |  | GPX6   |
|  |  |  | GPX7   |
|  |  |  | GSS    |
|  |  |  | GSTP1  |
|  |  |  | GTF2I  |
|  |  |  | HMOX1  |
|  |  |  | KRT1   |
|  |  |  | LPO    |
|  |  |  | MB     |
|  |  |  | MBL2   |
|  |  |  | MGST3  |
|  |  |  | MPO    |
|  |  |  | MPV17  |
|  |  |  | MT3    |
|  |  |  | NCF2   |
|  |  |  | NCF4   |
|  |  |  | NOS2A  |
|  |  |  | NOX4   |
|  |  |  | NOX5   |
|  |  |  | NQO1   |
|  |  |  | NUDT1  |
|  |  |  | OXR1   |
|  |  |  | OXS1   |
|  |  |  | PDLIM1 |

|  |  |  |        |
|--|--|--|--------|
|  |  |  | PNKP   |
|  |  |  | PRDX1  |
|  |  |  | PRDX2  |
|  |  |  | PRDX3  |
|  |  |  | PRDX5  |
|  |  |  | PRDX6  |
|  |  |  | PREX1  |
|  |  |  | PTGS2  |
|  |  |  | PXDN   |
|  |  |  | RNF7   |
|  |  |  | SCARA3 |
|  |  |  | SELS   |
|  |  |  | SEPP1  |
|  |  |  | SFTPD  |
|  |  |  | SIRT2  |
|  |  |  | SOD1   |
|  |  |  | SOD2   |
|  |  |  | SOD3   |
|  |  |  | SQSTM1 |
|  |  |  | SRXN1  |
|  |  |  | STK25  |
|  |  |  | STK25  |
|  |  |  | TPO    |
|  |  |  | TTN    |
|  |  |  | TXN    |
|  |  |  | TXNRD1 |
|  |  |  | TXNRD2 |
|  |  |  | UCP2   |
